# Supplementary material for: Integrated Fecal Microbiome and Serum Metabolomics Analysis Reveals Abnormal Changes in Rats with Immunoglobulin A Nephropathy and the Intervention Effect of Zhen Wu Tang
Source: Front Pharmacol. 2021 Jan 27;11:606689. doi: 10.3389/fphar.2020.606689 (PMC7872959; doi:10.3389/fphar.2020.606689)
Supplement: Supplementary file 3 [file table3.xls]

## Sheet: profilng.Phylum
Phylum	Normal-1_tags	Normal-2_tags	Normal-3_tags	Normal-4_tags	Normal-5_tags	Model-1_tags	Model-2_tags	Model-3_tags	Model-4_tags	Model-5_tags	Normal-1_relative_abundance	Normal-2_relative_abundance	Normal-3_relative_abundance	Normal-4_relative_abundance	Normal-5_relative_abundance	Model-1_relative_abundance	Model-2_relative_abundance	Model-3_relative_abundance	Model-4_relative_abundance	Model-5_relative_abundance
Bacteria;Firmicutes	23624	51707	50967	42922	45449	54839	54340	37612	43133	55813	40.637	65.2513	60.4849	65.5689	61.6149	71.327	69.9717	53.4794	67.9625	79.3722
Bacteria;Bacteroidetes	32496	22019	30509	19895	24262	19186	18829	27164	15894	11060	55.8984	27.7867	36.2064	30.3922	32.8918	24.9545	24.2455	38.6237	25.0434	15.7285
Bacteria;Actinobacteria	894	2720	919	1025	1362	1359	3665	3262	3014	1149	1.5378	3.4325	1.0906	1.5658	1.8465	1.7676	4.7193	4.6381	4.749	1.634
Bacteria;Proteobacteria	648	505	842	802	685	960	639	1751	1284	2069	1.1147	0.6373	0.9992	1.2252	0.9287	1.2486	0.8228	2.4897	2.0231	2.9423
Archaea;Euryarchaeota	188	1630	214	267	1502	0	0	10	1	3	0.3234	2.057	0.254	0.4079	2.0363	0	0	0.0142	0.0016	0.0043
Bacteria;Patescibacteria	117	366	470	96	274	268	16	238	29	116	0.2013	0.4619	0.5578	0.1467	0.3715	0.3486	0.0206	0.3384	0.0457	0.165
Bacteria;Cyanobacteria	43	139	108	338	109	112	10	26	12	6	0.074	0.1754	0.1282	0.5163	0.1478	0.1457	0.0129	0.037	0.0189	0.0085
Bacteria;Epsilonbacteraeota	8	14	6	15	8	20	77	191	37	20	0.0138	0.0177	0.0071	0.0229	0.0108	0.026	0.0991	0.2716	0.0583	0.0284
Bacteria;Tenericutes	57	39	150	7	14	51	18	25	16	28	0.098	0.0492	0.178	0.0107	0.019	0.0663	0.0232	0.0355	0.0252	0.0398
Bacteria;Elusimicrobia	2	16	4	2	0	2	0	0	1	0	0.0034	0.0202	0.0047	0.0031	0	0.0026	0	0	0.0016	0
Bacteria;Deferribacteres	0	2	0	2	2	3	0	0	0	5	0	0.0025	0	0.0031	0.0027	0.0039	0	0	0	0.0071
Bacteria;Acidobacteria	0	7	0	0	0	0	0	0	1	0	0	0.0088	0	0	0	0	0	0	0.0016	0
Bacteria;Gemmatimonadetes	0	0	0	0	0	0	0	0	0	4	0	0	0	0	0	0	0	0	0	0.0057
Bacteria;Lentisphaerae	0	0	0	0	0	0	0	2	1	0	0	0	0	0	0	0	0	0.0028	0.0016	0
Bacteria;RsaHF231	0	0	0	0	0	1	0	2	0	0	0	0	0	0	0	0.0013	0	0.0028	0	0
Bacteria;Kiritimatiellaeota	0	1	0	0	0	1	0	0	0	0	0	0.0013	0	0	0	0.0013	0	0	0	0
Bacteria;Spirochaetes	0	1	0	0	0	1	0	0	0	0	0	0.0013	0	0	0	0.0013	0	0	0	0
Bacteria;Planctomycetes	0	0	0	0	0	0	1	0	0	0	0	0	0	0	0	0	0.0013	0	0	0
Unclassified	57	77	75	90	96	81	65	47	43	45	0.098	0.0972	0.089	0.1375	0.1301	0.1054	0.0837	0.0668	0.0678	0.064

## Sheet: Class
Class	Normal-1_tags	Normal-2_tags	Normal-3_tags	Normal-4_tags	Normal-5_tags	Model-1_tags	Model-2_tags	Model-3_tags	Model-4_tags	Model-5_tags	Normal-1_relative_abundance	Normal-2_relative_abundance	Normal-3_relative_abundance	Normal-4_relative_abundance	Normal-5_relative_abundance	Model-1_relative_abundance	Model-2_relative_abundance	Model-3_relative_abundance	Model-4_relative_abundance	Model-5_relative_abundance
Bacteria;Firmicutes;Clostridia	15555	27561	31341	28245	29929	40965	24214	23354	21508	40100	26.7571	34.7804	37.1938	43.1479	40.5746	53.2816	31.1795	33.2064	33.8891	57.0266
Bacteria;Bacteroidetes;Bacteroidia	32496	22019	30509	19895	24262	19186	18829	27164	15894	11060	55.8984	27.7867	36.2064	30.3922	32.8918	24.9545	24.2455	38.6237	25.0434	15.7285
Bacteria;Firmicutes;Bacilli	4349	14508	10248	6086	8625	7518	9944	10161	15481	11874	7.481	18.3083	12.1618	9.2972	11.6929	9.7784	12.8045	14.4476	24.3926	16.8861
Bacteria;Firmicutes;Negativicutes	2899	8281	8378	8065	6220	5165	19375	3306	5253	2927	4.9867	10.4501	9.9426	12.3203	8.4324	6.7179	24.9485	4.7007	8.2769	4.1625
Bacteria;Actinobacteria;Coriobacteriia	782	2518	803	947	1249	692	3118	1248	1668	726	1.3452	3.1776	0.953	1.4467	1.6933	0.9001	4.0149	1.7745	2.6282	1.0325
Bacteria;Firmicutes;Erysipelotrichia	794	1323	990	469	658	1168	786	776	857	898	1.3658	1.6695	1.1749	0.7165	0.892	1.5192	1.0121	1.1034	1.3503	1.2771
Bacteria;Proteobacteria;Gammaproteobacteria	231	272	326	394	276	734	568	1459	1218	937	0.3974	0.3432	0.3869	0.6019	0.3742	0.9547	0.7314	2.0745	1.9191	1.3325
Bacteria;Actinobacteria;Actinobacteria	112	193	116	78	113	667	547	2014	1346	423	0.1927	0.2436	0.1377	0.1192	0.1532	0.8675	0.7044	2.8636	2.1208	0.6016
Archaea;Euryarchaeota;Methanobacteria	188	1630	214	267	1502	0	0	10	1	3	0.3234	2.057	0.254	0.4079	2.0363	0	0	0.0142	0.0016	0.0043
Bacteria;Proteobacteria;Deltaproteobacteria	412	222	474	281	403	211	58	270	54	1121	0.7087	0.2802	0.5625	0.4293	0.5463	0.2744	0.0747	0.3839	0.0851	1.5942
Bacteria;Patescibacteria;Saccharimonadia	117	366	470	96	274	268	16	238	29	116	0.2013	0.4619	0.5578	0.1467	0.3715	0.3486	0.0206	0.3384	0.0457	0.165
Bacteria;Cyanobacteria;Melainabacteria	40	139	108	337	109	111	10	24	12	5	0.0688	0.1754	0.1282	0.5148	0.1478	0.1444	0.0129	0.0341	0.0189	0.0071
Bacteria;Epsilonbacteraeota;Campylobacteria	8	14	6	15	8	20	77	191	37	20	0.0138	0.0177	0.0071	0.0229	0.0108	0.026	0.0991	0.2716	0.0583	0.0284
Bacteria;Tenericutes;Mollicutes	57	39	150	7	14	51	18	25	16	28	0.098	0.0492	0.178	0.0107	0.019	0.0663	0.0232	0.0355	0.0252	0.0398
Bacteria;Proteobacteria;Alphaproteobacteria	5	11	42	127	6	15	13	22	12	11	0.0086	0.0139	0.0498	0.194	0.0081	0.0195	0.0167	0.0313	0.0189	0.0156
Bacteria;Elusimicrobia;Elusimicrobia	2	16	4	2	0	2	0	0	1	0	0.0034	0.0202	0.0047	0.0031	0	0.0026	0	0	0.0016	0
Bacteria;Deferribacteres;Deferribacteres	0	2	0	2	2	3	0	0	0	5	0	0.0025	0	0.0031	0.0027	0.0039	0	0	0	0.0071
Bacteria;Cyanobacteria;Oxyphotobacteria	3	0	0	1	0	1	0	2	0	1	0.0052	0	0	0.0015	0	0.0013	0	0.0028	0	0.0014
Bacteria;Actinobacteria;Acidimicrobiia	0	9	0	0	0	0	0	0	0	0	0	0.0114	0	0	0	0	0	0	0	0
Bacteria;Acidobacteria;Blastocatellia_Subgroup_4	0	7	0	0	0	0	0	0	0	0	0	0.0088	0	0	0	0	0	0	0	0
Bacteria;Gemmatimonadetes;Gemmatimonadetes	0	0	0	0	0	0	0	0	0	4	0	0	0	0	0	0	0	0	0	0.0057
Bacteria;Lentisphaerae;Lentisphaeria	0	0	0	0	0	0	0	2	1	0	0	0	0	0	0	0	0	0.0028	0.0016	0
Bacteria;RsaHF231;bacterium_PM5-3	0	0	0	0	0	1	0	2	0	0	0	0	0	0	0	0.0013	0	0.0028	0	0
Bacteria;Kiritimatiellaeota;Kiritimatiellae	0	1	0	0	0	1	0	0	0	0	0	0.0013	0	0	0	0.0013	0	0	0	0
Bacteria;Spirochaetes;Spirochaetia	0	1	0	0	0	1	0	0	0	0	0	0.0013	0	0	0	0.0013	0	0	0	0
Bacteria;Acidobacteria;Subgroup_6	0	0	0	0	0	0	0	0	1	0	0	0	0	0	0	0	0	0	0.0016	0
Bacteria;Planctomycetes;Planctomycetacia	0	0	0	0	0	0	1	0	0	0	0	0	0	0	0	0	0.0013	0	0	0
Unclassified	84	111	85	147	113	104	86	62	77	59	0.1445	0.1401	0.1009	0.2246	0.1532	0.1353	0.1107	0.0882	0.1213	0.0839

## Sheet: Order
Order	Normal-1_tags	Normal-2_tags	Normal-3_tags	Normal-4_tags	Normal-5_tags	Model-1_tags	Model-2_tags	Model-3_tags	Model-4_tags	Model-5_tags	Normal-1_relative_abundance	Normal-2_relative_abundance	Normal-3_relative_abundance	Normal-4_relative_abundance	Normal-5_relative_abundance	Model-1_relative_abundance	Model-2_relative_abundance	Model-3_relative_abundance	Model-4_relative_abundance	Model-5_relative_abundance
Bacteria;Firmicutes;Clostridia;Clostridiales	15554	27561	31340	28235	29928	40958	24199	23350	21504	40087	26.7553	34.7804	37.1926	43.1326	40.5732	53.2725	31.1602	33.2007	33.8828	57.0081
Bacteria;Bacteroidetes;Bacteroidia;Bacteroidales	32492	22017	30509	19888	24260	19175	18824	27157	15889	11060	55.8915	27.7842	36.2064	30.3815	32.8891	24.9402	24.239	38.6137	25.0355	15.7285
Bacteria;Firmicutes;Bacilli;Lactobacillales	4340	14504	10240	6082	8623	7502	9936	10040	15421	11848	7.4655	18.3032	12.1523	9.291	11.6901	9.7576	12.7942	14.2756	24.2981	16.8492
Bacteria;Firmicutes;Negativicutes;Selenomonadales	2899	8281	8378	8065	6220	5165	19375	3306	5253	2927	4.9867	10.4501	9.9426	12.3203	8.4324	6.7179	24.9485	4.7007	8.2769	4.1625
Bacteria;Actinobacteria;Coriobacteriia;Coriobacteriales	782	2518	803	947	1249	692	3118	1248	1668	726	1.3452	3.1776	0.953	1.4467	1.6933	0.9001	4.0149	1.7745	2.6282	1.0325
Bacteria;Firmicutes;Erysipelotrichia;Erysipelotrichales	794	1323	990	469	658	1168	786	776	857	898	1.3658	1.6695	1.1749	0.7165	0.892	1.5192	1.0121	1.1034	1.3503	1.2771
Bacteria;Proteobacteria;Gammaproteobacteria;Betaproteobacteriales	149	162	170	286	173	513	344	508	688	663	0.2563	0.2044	0.2017	0.4369	0.2345	0.6672	0.443	0.7223	1.084	0.9429
Archaea;Euryarchaeota;Methanobacteria;Methanobacteriales	188	1630	214	267	1502	0	0	10	1	3	0.3234	2.057	0.254	0.4079	2.0363	0	0	0.0142	0.0016	0.0043
Bacteria;Proteobacteria;Deltaproteobacteria;Desulfovibrionales	412	222	474	281	403	211	58	269	54	1121	0.7087	0.2802	0.5625	0.4293	0.5463	0.2744	0.0747	0.3825	0.0851	1.5942
Bacteria;Actinobacteria;Actinobacteria;Bifidobacteriales	30	131	61	5	17	379	508	767	901	265	0.0516	0.1653	0.0724	0.0076	0.023	0.493	0.6541	1.0906	1.4197	0.3769
Bacteria;Proteobacteria;Gammaproteobacteria;Enterobacteriales	71	93	136	88	60	202	222	872	492	256	0.1221	0.1174	0.1614	0.1344	0.0813	0.2627	0.2859	1.2399	0.7752	0.3641
Bacteria;Actinobacteria;Actinobacteria;Corynebacteriales	68	46	45	30	31	239	31	1243	427	153	0.117	0.058	0.0534	0.0458	0.042	0.3109	0.0399	1.7674	0.6728	0.2176
Bacteria;Patescibacteria;Saccharimonadia;Saccharimonadales	117	366	470	96	274	268	16	238	29	116	0.2013	0.4619	0.5578	0.1467	0.3715	0.3486	0.0206	0.3384	0.0457	0.165
Bacteria;Cyanobacteria;Melainabacteria;Gastranaerophilales	40	139	108	337	109	111	10	24	12	5	0.0688	0.1754	0.1282	0.5148	0.1478	0.1444	0.0129	0.0341	0.0189	0.0071
Bacteria;Epsilonbacteraeota;Campylobacteria;Campylobacterales	8	14	6	15	8	20	77	191	37	20	0.0138	0.0177	0.0071	0.0229	0.0108	0.026	0.0991	0.2716	0.0583	0.0284
Bacteria;Tenericutes;Mollicutes;Mollicutes_RF39	57	39	150	7	14	51	18	24	16	23	0.098	0.0492	0.178	0.0107	0.019	0.0663	0.0232	0.0341	0.0252	0.0327
Bacteria;Firmicutes;Bacilli;Bacillales	8	4	8	4	1	16	8	121	58	26	0.0138	0.005	0.0095	0.0061	0.0014	0.0208	0.0103	0.172	0.0914	0.037
Bacteria;Proteobacteria;Alphaproteobacteria;Rhodospirillales	5	9	35	127	1	14	9	20	9	9	0.0086	0.0114	0.0415	0.194	0.0014	0.0182	0.0116	0.0284	0.0142	0.0128
Bacteria;Actinobacteria;Actinobacteria;Micrococcales	14	14	9	43	61	48	7	4	15	4	0.0241	0.0177	0.0107	0.0657	0.0827	0.0624	0.009	0.0057	0.0236	0.0057
Bacteria;Proteobacteria;Gammaproteobacteria;Pseudomonadales	3	5	15	3	15	6	2	76	25	12	0.0052	0.0063	0.0178	0.0046	0.0203	0.0078	0.0026	0.1081	0.0394	0.0171
Bacteria;Proteobacteria;Gammaproteobacteria;Pasteurellales	8	1	3	12	3	11	0	1	13	6	0.0138	0.0013	0.0036	0.0183	0.0041	0.0143	0	0.0014	0.0205	0.0085
Bacteria;Proteobacteria;Gammaproteobacteria;Aeromonadales	0	9	0	0	21	1	0	0	0	0	0	0.0114	0	0	0.0285	0.0013	0	0	0	0
Bacteria;Elusimicrobia;Elusimicrobia;Elusimicrobiales	2	16	4	2	0	2	0	0	1	0	0.0034	0.0202	0.0047	0.0031	0	0.0026	0	0	0.0016	0
Bacteria;Deferribacteres;Deferribacteres;Deferribacterales	0	2	0	2	2	3	0	0	0	5	0	0.0025	0	0.0031	0.0027	0.0039	0	0	0	0.0071
Bacteria;Actinobacteria;Actinobacteria;Actinomycetales	0	0	0	0	4	1	1	0	3	1	0	0	0	0	0.0054	0.0013	0.0013	0	0.0047	0.0014
Bacteria;Proteobacteria;Alphaproteobacteria;Rhizobiales	0	2	3	0	1	1	2	1	0	0	0	0.0025	0.0036	0	0.0014	0.0013	0.0026	0.0014	0	0
Bacteria;Cyanobacteria;Oxyphotobacteria;Chloroplast	3	0	0	1	0	1	0	2	0	1	0.0052	0	0	0.0015	0	0.0013	0	0.0028	0	0.0014
Bacteria;Actinobacteria;Acidimicrobiia;Microtrichales	0	9	0	0	0	0	0	0	0	0	0	0.0114	0	0	0	0	0	0	0	0
Bacteria;Proteobacteria;Alphaproteobacteria;Caulobacterales	0	0	1	0	3	0	2	0	2	0	0	0	0.0012	0	0.0041	0	0.0026	0	0.0032	0
Bacteria;Acidobacteria;Blastocatellia_Subgroup_4;11-24	0	7	0	0	0	0	0	0	0	0	0	0.0088	0	0	0	0	0	0	0	0
Bacteria;Tenericutes;Mollicutes;Anaeroplasmatales	0	0	0	0	0	0	0	1	0	5	0	0	0	0	0	0	0	0.0014	0	0.0071
Bacteria;Proteobacteria;Gammaproteobacteria;Xanthomonadales	0	0	0	1	4	0	0	0	0	0	0	0	0	0.0015	0.0054	0	0	0	0	0
Bacteria;Proteobacteria;Gammaproteobacteria;Alteromonadales	0	2	2	1	0	0	0	0	0	0	0	0.0025	0.0024	0.0015	0	0	0	0	0	0
Bacteria;Proteobacteria;Alphaproteobacteria;Sphingomonadales	0	0	0	0	1	0	0	0	1	2	0	0	0	0	0.0014	0	0	0	0.0016	0.0028
Bacteria;Gemmatimonadetes;Gemmatimonadetes;Gemmatimonadales	0	0	0	0	0	0	0	0	0	4	0	0	0	0	0	0	0	0	0	0.0057
Bacteria;Proteobacteria;Gammaproteobacteria;Oceanospirillales	0	0	0	3	0	0	0	0	0	0	0	0	0	0.0046	0	0	0	0	0	0
Bacteria;Lentisphaerae;Lentisphaeria;Victivallales	0	0	0	0	0	0	0	2	1	0	0	0	0	0	0	0	0	0.0028	0.0016	0
Bacteria;Proteobacteria;Alphaproteobacteria;Dongiales	0	0	3	0	0	0	0	0	0	0	0	0	0.0036	0	0	0	0	0	0	0
Bacteria;Proteobacteria;Gammaproteobacteria;Acidiferrobacterales	0	0	0	0	0	0	0	2	0	0	0	0	0	0	0	0	0	0.0028	0	0
Bacteria;Spirochaetes;Spirochaetia;Spirochaetales	0	1	0	0	0	1	0	0	0	0	0	0.0013	0	0	0	0.0013	0	0	0	0
Bacteria;Kiritimatiellaeota;Kiritimatiellae;WCHB1-41	0	1	0	0	0	1	0	0	0	0	0	0.0013	0	0	0	0.0013	0	0	0	0
Bacteria;Actinobacteria;Actinobacteria;Propionibacteriales	0	2	0	0	0	0	0	0	0	0	0	0.0025	0	0	0	0	0	0	0	0
Bacteria;Bacteroidetes;Bacteroidia;Flavobacteriales	0	0	0	1	0	0	0	0	0	0	0	0	0	0.0015	0	0	0	0	0	0
Bacteria;Proteobacteria;Deltaproteobacteria;Bdellovibrionales	0	0	0	0	0	0	0	1	0	0	0	0	0	0	0	0	0	0.0014	0	0
Bacteria;Proteobacteria;Alphaproteobacteria;Rickettsiales	0	0	0	0	0	0	0	1	0	0	0	0	0	0	0	0	0	0.0014	0	0
Bacteria;Planctomycetes;Planctomycetacia;Pirellulales	0	0	0	0	0	0	1	0	0	0	0	0	0	0	0	0	0.0013	0	0	0
Bacteria;Actinobacteria;Actinobacteria;Frankiales	0	0	1	0	0	0	0	0	0	0	0	0	0.0012	0	0	0	0	0	0	0
Unclassified	90	113	86	163	117	124	106	75	89	72	0.1548	0.1426	0.1021	0.249	0.1586	0.1613	0.1365	0.1066	0.1402	0.1024

## Sheet: Family
Family	Normal-1_tags	Normal-2_tags	Normal-3_tags	Normal-4_tags	Normal-5_tags	Model-1_tags	Model-2_tags	Model-3_tags	Model-4_tags	Model-5_tags	Normal-1_relative_abundance	Normal-2_relative_abundance	Normal-3_relative_abundance	Normal-4_relative_abundance	Normal-5_relative_abundance	Model-1_relative_abundance	Model-2_relative_abundance	Model-3_relative_abundance	Model-4_relative_abundance	Model-5_relative_abundance
Bacteria;Bacteroidetes;Bacteroidia;Bacteroidales;Muribaculaceae	29601	18916	25254	15121	21419	12559	7485	19368	8743	6889	50.9185	23.8709	29.9701	23.0993	29.0376	16.335	9.6382	27.5388	13.7759	9.7969
Bacteria;Firmicutes;Clostridia;Clostridiales;Ruminococcaceae	9707	20880	24044	18158	19340	22063	12616	11494	6351	17265	16.6976	26.3494	28.5341	27.7387	26.2191	28.6965	16.2452	16.343	10.007	24.5527
Bacteria;Firmicutes;Bacilli;Lactobacillales;Lactobacillaceae	4090	14402	9943	5628	7729	7288	9806	9507	14971	11715	7.0355	18.1745	11.7998	8.5975	10.4782	9.4792	12.6268	13.5177	23.589	16.66
Bacteria;Firmicutes;Clostridia;Clostridiales;Lachnospiraceae	2824	3823	3883	8148	8444	14825	9957	9462	11018	21009	4.8577	4.8244	4.6081	12.4471	11.4475	19.2823	12.8213	13.4537	17.3605	29.8771
Bacteria;Firmicutes;Negativicutes;Selenomonadales;Acidaminococcaceae	2595	5667	8246	6329	5564	4887	15456	2701	5101	2480	4.4638	7.1514	9.7859	9.6684	7.5431	6.3563	19.9021	3.8405	8.0374	3.5268
Bacteria;Bacteroidetes;Bacteroidia;Bacteroidales;Prevotellaceae	950	1158	2639	3436	1132	1764	7607	3654	2861	953	1.6342	1.4613	3.1318	5.2489	1.5346	2.2944	9.7953	5.1955	4.5079	1.3553
Bacteria;Bacteroidetes;Bacteroidia;Bacteroidales;Rikenellaceae	1554	1451	2177	798	1316	3348	2290	2301	2521	2574	2.6731	1.8311	2.5835	1.2191	1.7841	4.3546	2.9488	3.2717	3.9722	3.6605
Bacteria;Firmicutes;Negativicutes;Selenomonadales;Veillonellaceae	303	2610	132	1730	654	278	3897	604	151	446	0.5212	3.2937	0.1567	2.6428	0.8866	0.3616	5.018	0.8588	0.2379	0.6343
Bacteria;Actinobacteria;Coriobacteriia;Coriobacteriales;Coriobacteriaceae	432	2042	374	656	600	237	2873	675	1355	371	0.7431	2.5769	0.4438	1.0021	0.8134	0.3083	3.6995	0.9598	2.135	0.5276
Bacteria;Firmicutes;Erysipelotrichia;Erysipelotrichales;Erysipelotrichaceae	794	1323	990	469	658	1168	786	776	857	898	1.3658	1.6695	1.1749	0.7165	0.892	1.5192	1.0121	1.1034	1.3503	1.2771
Bacteria;Firmicutes;Clostridia;Clostridiales;Peptostreptococcaceae	1264	944	1232	395	689	1192	327	716	679	551	2.1743	1.1913	1.4621	0.6034	0.9341	1.5504	0.4211	1.0181	1.0699	0.7836
Bacteria;Firmicutes;Clostridia;Clostridiales;Clostridiaceae_1	707	335	316	132	112	1497	576	960	2572	477	1.2162	0.4228	0.375	0.2016	0.1518	1.9471	0.7417	1.365	4.0526	0.6783
Bacteria;Bacteroidetes;Bacteroidia;Bacteroidales;Bacteroidaceae	233	370	336	435	308	875	1118	1325	1286	425	0.4008	0.4669	0.3987	0.6645	0.4176	1.1381	1.4396	1.884	2.0263	0.6044
Bacteria;Firmicutes;Clostridia;Clostridiales;Christensenellaceae	684	1171	994	798	726	457	414	225	541	302	1.1766	1.4777	1.1796	1.219	0.9842	0.5944	0.5331	0.3199	0.8524	0.4295
Bacteria;Proteobacteria;Gammaproteobacteria;Betaproteobacteriales;Burkholderiaceae	149	162	170	285	173	513	344	508	688	663	0.2563	0.2044	0.2017	0.4354	0.2345	0.6672	0.443	0.7223	1.084	0.9429
Archaea;Euryarchaeota;Methanobacteria;Methanobacteriales;Methanobacteriaceae	188	1630	214	267	1502	0	0	10	1	3	0.3234	2.057	0.254	0.4079	2.0363	0	0	0.0142	0.0016	0.0043
Bacteria;Proteobacteria;Deltaproteobacteria;Desulfovibrionales;Desulfovibrionaceae	412	222	474	281	403	211	58	269	54	1121	0.7087	0.2802	0.5625	0.4293	0.5463	0.2744	0.0747	0.3825	0.0851	1.5942
Bacteria;Actinobacteria;Coriobacteriia;Coriobacteriales;Eggerthellaceae	297	348	342	224	575	292	182	435	214	282	0.5109	0.4392	0.4059	0.3422	0.7795	0.3798	0.2344	0.6185	0.3372	0.401
Bacteria;Actinobacteria;Actinobacteria;Bifidobacteriales;Bifidobacteriaceae	30	131	61	5	17	379	508	767	901	265	0.0516	0.1653	0.0724	0.0076	0.023	0.493	0.6541	1.0906	1.4197	0.3769
Bacteria;Firmicutes;Clostridia;Clostridiales;Family_XIII	226	251	601	422	337	482	79	201	118	212	0.3888	0.3167	0.7132	0.6447	0.4569	0.6269	0.1017	0.2858	0.1859	0.3015
Bacteria;Proteobacteria;Gammaproteobacteria;Enterobacteriales;Enterobacteriaceae	71	93	136	88	60	202	222	872	492	256	0.1221	0.1174	0.1614	0.1344	0.0813	0.2627	0.2859	1.2399	0.7752	0.3641
Bacteria;Actinobacteria;Actinobacteria;Corynebacteriales;Corynebacteriaceae	68	46	45	30	31	239	31	1243	427	153	0.117	0.058	0.0534	0.0458	0.042	0.3109	0.0399	1.7674	0.6728	0.2176
Bacteria;Firmicutes;Bacilli;Lactobacillales;Streptococcaceae	243	85	291	450	876	150	121	54	32	67	0.418	0.1073	0.3453	0.6874	1.1876	0.1951	0.1558	0.0768	0.0504	0.0953
Bacteria;Patescibacteria;Saccharimonadia;Saccharimonadales;Saccharimonadaceae	117	366	470	96	274	268	16	238	29	116	0.2013	0.4619	0.5578	0.1467	0.3715	0.3486	0.0206	0.3384	0.0457	0.165
Bacteria;Bacteroidetes;Bacteroidia;Bacteroidales;Tannerellaceae	62	45	49	34	26	513	278	392	340	139	0.1066	0.0568	0.0582	0.0519	0.0352	0.6672	0.358	0.5574	0.5357	0.1977
Bacteria;Firmicutes;Bacilli;Lactobacillales;Aerococcaceae	3	11	2	0	7	33	8	398	316	53	0.0052	0.0139	0.0024	0	0.0095	0.0429	0.0103	0.5659	0.4979	0.0754
Bacteria;Firmicutes;Clostridia;Clostridiales;Clostridiales_vadinBB60_group	26	8	23	5	3	116	23	175	95	110	0.0447	0.0101	0.0273	0.0076	0.0041	0.1509	0.0296	0.2488	0.1497	0.1564
Bacteria;Firmicutes;Clostridia;Clostridiales;Peptococcaceae	48	35	118	48	130	54	61	22	24	34	0.0826	0.0442	0.14	0.0733	0.1762	0.0702	0.0785	0.0313	0.0378	0.0484
Bacteria;Actinobacteria;Coriobacteriia;Coriobacteriales;Atopobiaceae	10	66	5	1	29	112	29	85	75	50	0.0172	0.0833	0.0059	0.0015	0.0393	0.1457	0.0373	0.1209	0.1182	0.0711
Bacteria;Epsilonbacteraeota;Campylobacteria;Campylobacterales;Helicobacteraceae	8	14	6	15	8	20	77	191	37	20	0.0138	0.0177	0.0071	0.0229	0.0108	0.026	0.0991	0.2716	0.0583	0.0284
Bacteria;Firmicutes;Clostridia;Clostridiales;Defluviitaleaceae	22	52	59	17	37	31	19	22	13	13	0.0378	0.0656	0.07	0.026	0.0502	0.0403	0.0245	0.0313	0.0205	0.0185
Bacteria;Bacteroidetes;Bacteroidia;Bacteroidales;Marinifilaceae	10	9	21	21	13	21	24	57	57	25	0.0172	0.0114	0.0249	0.0321	0.0176	0.0273	0.0309	0.081	0.0898	0.0356
Bacteria;Firmicutes;Bacilli;Lactobacillales;Enterococcaceae	4	4	4	4	5	30	1	74	92	13	0.0069	0.005	0.0047	0.0061	0.0068	0.039	0.0013	0.1052	0.145	0.0185
Bacteria;Firmicutes;Bacilli;Bacillales;Staphylococcaceae	7	2	7	4	1	16	8	102	45	23	0.012	0.0025	0.0083	0.0061	0.0014	0.0208	0.0103	0.145	0.0709	0.0327
Bacteria;Actinobacteria;Actinobacteria;Micrococcales;Micrococcaceae	14	14	9	43	61	48	7	4	15	4	0.0241	0.0177	0.0107	0.0657	0.0827	0.0624	0.009	0.0057	0.0236	0.0057
Bacteria;Bacteroidetes;Bacteroidia;Bacteroidales;Barnesiellaceae	30	40	7	6	10	10	3	18	20	7	0.0516	0.0505	0.0083	0.0092	0.0136	0.013	0.0039	0.0256	0.0315	0.01
Bacteria;Proteobacteria;Gammaproteobacteria;Pseudomonadales;Moraxellaceae	2	5	15	0	13	6	1	72	23	12	0.0034	0.0063	0.0178	0	0.0176	0.0078	0.0013	0.1024	0.0362	0.0171
Bacteria;Firmicutes;Clostridia;Clostridiales;Eubacteriaceae	0	1	5	5	1	39	63	11	6	6	0	0.0013	0.0059	0.0076	0.0014	0.0507	0.0811	0.0156	0.0095	0.0085
Bacteria;Actinobacteria;Coriobacteriia;Coriobacteriales;Coriobacteriales_Incertae_Sedis	4	12	18	5	8	13	8	3	6	8	0.0069	0.0151	0.0214	0.0076	0.0108	0.0169	0.0103	0.0043	0.0095	0.0114
Bacteria;Proteobacteria;Gammaproteobacteria;Pasteurellales;Pasteurellaceae	8	1	3	12	3	11	0	1	13	6	0.0138	0.0013	0.0036	0.0183	0.0041	0.0143	0	0.0014	0.0205	0.0085
Bacteria;Firmicutes;Bacilli;Bacillales;Planococcaceae	0	2	1	0	0	0	0	19	13	3	0	0.0025	0.0012	0	0	0	0	0.027	0.0205	0.0043
Bacteria;Proteobacteria;Gammaproteobacteria;Aeromonadales;Aeromonadaceae	0	9	0	0	21	1	0	0	0	0	0	0.0114	0	0	0.0285	0.0013	0	0	0	0
Bacteria;Elusimicrobia;Elusimicrobia;Elusimicrobiales;Elusimicrobiaceae	2	16	4	2	0	2	0	0	1	0	0.0034	0.0202	0.0047	0.0031	0	0.0026	0	0	0.0016	0
Bacteria;Deferribacteres;Deferribacteres;Deferribacterales;Deferribacteraceae	0	2	0	2	2	3	0	0	0	5	0	0.0025	0	0.0031	0.0027	0.0039	0	0	0	0.0071
Bacteria;Proteobacteria;Gammaproteobacteria;Pseudomonadales;Pseudomonadaceae	1	0	0	3	2	0	1	4	2	0	0.0017	0	0	0.0046	0.0027	0	0.0013	0.0057	0.0032	0
Bacteria;Actinobacteria;Actinobacteria;Actinomycetales;Actinomycetaceae	0	0	0	0	4	1	1	0	3	1	0	0	0	0	0.0054	0.0013	0.0013	0	0.0047	0.0014
Bacteria;Firmicutes;Bacilli;Lactobacillales;Carnobacteriaceae	0	0	0	0	0	1	0	7	1	0	0	0	0	0	0	0.0013	0	0.01	0.0016	0
Bacteria;Actinobacteria;Acidimicrobiia;Microtrichales;Iamiaceae	0	9	0	0	0	0	0	0	0	0	0	0.0114	0	0	0	0	0	0	0	0
Bacteria;Proteobacteria;Alphaproteobacteria;Caulobacterales;Caulobacteraceae	0	0	1	0	3	0	2	0	2	0	0	0	0.0012	0	0.0041	0	0.0026	0	0.0032	0
Bacteria;Proteobacteria;Alphaproteobacteria;Rhizobiales;Xanthobacteraceae	0	2	3	0	0	1	1	1	0	0	0	0.0025	0.0036	0	0	0.0013	0.0013	0.0014	0	0
Bacteria;Tenericutes;Mollicutes;Anaeroplasmatales;Anaeroplasmataceae	0	0	0	0	0	0	0	1	0	5	0	0	0	0	0	0	0	0.0014	0	0.0071
Bacteria;Firmicutes;Bacilli;Lactobacillales;Leuconostocaceae	0	0	0	0	6	0	0	0	0	0	0	0	0	0	0.0081	0	0	0	0	0
Bacteria;Proteobacteria;Gammaproteobacteria;Xanthomonadales;Xanthomonadaceae	0	0	0	1	4	0	0	0	0	0	0	0	0	0.0015	0.0054	0	0	0	0	0
Bacteria;Proteobacteria;Gammaproteobacteria;Alteromonadales;Psychromonadaceae	0	2	2	1	0	0	0	0	0	0	0	0.0025	0.0024	0.0015	0	0	0	0	0	0
Bacteria;Proteobacteria;Alphaproteobacteria;Sphingomonadales;Sphingomonadaceae	0	0	0	0	1	0	0	0	1	2	0	0	0	0	0.0014	0	0	0	0.0016	0.0028
Bacteria;Gemmatimonadetes;Gemmatimonadetes;Gemmatimonadales;Gemmatimonadaceae	0	0	0	0	0	0	0	0	0	4	0	0	0	0	0	0	0	0	0	0.0057
Bacteria;Proteobacteria;Gammaproteobacteria;Oceanospirillales;Halomonadaceae	0	0	0	3	0	0	0	0	0	0	0	0	0	0.0046	0	0	0	0	0	0
Bacteria;Lentisphaerae;Lentisphaeria;Victivallales;Victivallaceae	0	0	0	0	0	0	0	2	1	0	0	0	0	0	0	0	0	0.0028	0.0016	0
Bacteria;Proteobacteria;Alphaproteobacteria;Dongiales;Dongiaceae	0	0	3	0	0	0	0	0	0	0	0	0	0.0036	0	0	0	0	0	0	0
Bacteria;Proteobacteria;Gammaproteobacteria;Acidiferrobacterales;Acidiferrobacteraceae	0	0	0	0	0	0	0	2	0	0	0	0	0	0	0	0	0	0.0028	0	0
Bacteria;Spirochaetes;Spirochaetia;Spirochaetales;Spirochaetaceae	0	1	0	0	0	1	0	0	0	0	0	0.0013	0	0	0	0.0013	0	0	0	0
Bacteria;Actinobacteria;Actinobacteria;Propionibacteriales;Nocardioidaceae	0	2	0	0	0	0	0	0	0	0	0	0.0025	0	0	0	0	0	0	0	0
Bacteria;Firmicutes;Bacilli;Bacillales;Bacillaceae	1	0	0	0	0	0	0	0	0	0	0.0017	0	0	0	0	0	0	0	0	0
Bacteria;Proteobacteria;Gammaproteobacteria;Betaproteobacteriales;SC-I-84	0	0	0	1	0	0	0	0	0	0	0	0	0	0.0015	0	0	0	0	0	0
Bacteria;Bacteroidetes;Bacteroidia;Flavobacteriales;Weeksellaceae	0	0	0	1	0	0	0	0	0	0	0	0	0	0.0015	0	0	0	0	0	0
Bacteria;Proteobacteria;Deltaproteobacteria;Bdellovibrionales;Bdellovibrionaceae	0	0	0	0	0	0	0	1	0	0	0	0	0	0	0	0	0	0.0014	0	0
Bacteria;Proteobacteria;Alphaproteobacteria;Rhizobiales;Beijerinckiaceae	0	0	0	0	1	0	0	0	0	0	0	0	0	0	0.0014	0	0	0	0	0
Bacteria;Proteobacteria;Alphaproteobacteria;Rickettsiales;Mitochondria	0	0	0	0	0	0	0	1	0	0	0	0	0	0	0	0	0	0.0014	0	0
Bacteria;Cyanobacteria;Melainabacteria;Gastranaerophilales;Clostridium_sp_K4410MGS-306	0	1	0	0	0	0	0	0	0	0	0	0.0013	0	0	0	0	0	0	0	0
Bacteria;Planctomycetes;Planctomycetacia;Pirellulales;Pirellulaceae	0	0	0	0	0	0	1	0	0	0	0	0	0	0	0	0	0.0013	0	0	0
Bacteria;Proteobacteria;Alphaproteobacteria;Rhizobiales;Rhizobiaceae	0	0	0	0	0	0	1	0	0	0	0	0	0	0	0	0	0.0013	0	0	0
Bacteria;Actinobacteria;Actinobacteria;Frankiales;Geodermatophilaceae	0	0	1	0	0	0	0	0	0	0	0	0	0.0012	0	0	0	0	0	0	0
Unclassified	333	452	534	846	425	627	274	300	302	282	0.5728	0.5704	0.6337	1.2924	0.5762	0.8155	0.3528	0.4266	0.4759	0.401

## Sheet: Genus
Genus	Normal-1_tags	Normal-2_tags	Normal-3_tags	Normal-4_tags	Normal-5_tags	Model-1_tags	Model-2_tags	Model-3_tags	Model-4_tags	Model-5_tags	Normal-1_relative_abundance	Normal-2_relative_abundance	Normal-3_relative_abundance	Normal-4_relative_abundance	Normal-5_relative_abundance	Model-1_relative_abundance	Model-2_relative_abundance	Model-3_relative_abundance	Model-4_relative_abundance	Model-5_relative_abundance
Bacteria;Firmicutes;Bacilli;Lactobacillales;Lactobacillaceae;Lactobacillus	4089	14402	9943	5628	7729	7288	9806	9507	14971	11715	7.0337	18.1745	11.7998	8.5975	10.4782	9.4792	12.6268	13.5177	23.589	16.66
Bacteria;Firmicutes;Negativicutes;Selenomonadales;Acidaminococcaceae;Phascolarctobacterium	2591	5666	8244	6324	5560	4882	15455	2700	5100	2476	4.4569	7.1502	9.7835	9.6607	7.5377	6.3498	19.9009	3.839	8.0358	3.5211
Bacteria;Firmicutes;Clostridia;Clostridiales;Ruminococcaceae;Ruminococcaceae_UCG-014	1903	6666	10749	3084	4513	2352	389	1608	1358	812	3.2735	8.4121	12.7563	4.7112	6.1182	3.0592	0.5009	2.2864	2.1397	1.1547
Bacteria;Firmicutes;Clostridia;Clostridiales;Ruminococcaceae;Ruminococcus_2	309	4290	923	4365	3654	2963	2026	260	634	1006	0.5315	5.4137	1.0954	6.6681	4.9537	3.8539	2.6088	0.3697	0.999	1.4306
Bacteria;Bacteroidetes;Bacteroidia;Bacteroidales;Rikenellaceae;Rikenellaceae_RC9_gut_group	1426	1391	2136	701	1236	3157	2263	2191	2454	2422	2.453	1.7554	2.5349	1.0709	1.6756	4.1062	2.914	3.1153	3.8666	3.4444
Bacteria;Firmicutes;Clostridia;Clostridiales;Lachnospiraceae;Lachnospiraceae_NK4A136_group	406	323	1199	981	1650	1814	353	2484	1374	7762	0.6984	0.4076	1.4229	1.4986	2.2369	2.3594	0.4545	3.5319	2.1649	11.0384
Bacteria;Bacteroidetes;Bacteroidia;Bacteroidales;Prevotellaceae;Prevotella_9	345	714	793	2040	596	639	6255	1848	1917	478	0.5935	0.901	0.9411	3.1164	0.808	0.8311	8.0543	2.6276	3.0205	0.6798
Bacteria;Firmicutes;Clostridia;Clostridiales;Ruminococcaceae;Ruminococcus_1	125	469	337	1224	781	4149	2385	1098	637	1985	0.215	0.5919	0.3999	1.8698	1.0588	5.3964	3.0711	1.5612	1.0037	2.8229
Bacteria;Firmicutes;Clostridia;Clostridiales;Ruminococcaceae;Ruminococcaceae_NK4A214_group	1108	2011	4476	926	1463	297	739	240	119	200	1.9059	2.5378	5.3119	1.4146	1.9834	0.3863	0.9516	0.3412	0.1875	0.2844
Bacteria;Firmicutes;Negativicutes;Selenomonadales;Veillonellaceae;Megamonas	297	2594	114	1724	654	267	3880	587	141	424	0.5109	3.2735	0.1353	2.6336	0.8866	0.3473	4.9961	0.8346	0.2222	0.603
Bacteria;Actinobacteria;Coriobacteriia;Coriobacteriales;Coriobacteriaceae;Collinsella	432	2042	374	656	600	237	2873	675	1355	371	0.7431	2.5769	0.4438	1.0021	0.8134	0.3083	3.6995	0.9598	2.135	0.5276
Bacteria;Firmicutes;Clostridia;Clostridiales;Ruminococcaceae;Ruminiclostridium_9	341	190	503	281	222	1882	781	1493	532	2597	0.5866	0.2398	0.5969	0.4293	0.301	2.4478	1.0057	2.1229	0.8382	3.6932
Bacteria;Firmicutes;Clostridia;Clostridiales;Ruminococcaceae;Ruminococcaceae_UCG-005	354	1242	876	2886	2465	147	161	173	110	200	0.6089	1.5673	1.0396	4.4087	3.3418	0.1912	0.2073	0.246	0.1733	0.2844
Bacteria;Firmicutes;Clostridia;Clostridiales;Ruminococcaceae;Negativibacillus	515	1806	999	1078	1341	750	1270	445	311	243	0.8859	2.2791	1.1856	1.6468	1.818	0.9755	1.6353	0.6327	0.49	0.3456
Bacteria;Firmicutes;Clostridia;Clostridiales;Peptostreptococcaceae;Romboutsia	1260	940	1227	393	686	1183	326	715	676	550	2.1674	1.1862	1.4561	0.6004	0.93	1.5387	0.4198	1.0166	1.0651	0.7822
Bacteria;Firmicutes;Clostridia;Clostridiales;Clostridiaceae_1;Clostridium_sensu_stricto_1	695	335	315	130	109	1490	574	957	2557	470	1.1955	0.4228	0.3738	0.1986	0.1478	1.938	0.7391	1.3607	4.0289	0.6684
Bacteria;Firmicutes;Clostridia;Clostridiales;Ruminococcaceae;Eubacterium_coprostanoligenes_group	1354	1241	684	568	1050	926	333	138	179	241	2.3291	1.5661	0.8117	0.8677	1.4235	1.2044	0.4288	0.1962	0.282	0.3427
Bacteria;Bacteroidetes;Bacteroidia;Bacteroidales;Bacteroidaceae;Bacteroides	233	370	336	435	308	875	1118	1325	1286	425	0.4008	0.4669	0.3987	0.6645	0.4176	1.1381	1.4396	1.884	2.0263	0.6044
Bacteria;Firmicutes;Clostridia;Clostridiales;Christensenellaceae;Christensenellaceae_R-7_group	642	1120	940	782	701	448	395	213	530	290	1.1043	1.4134	1.1155	1.1946	0.9503	0.5827	0.5086	0.3029	0.8351	0.4124
Bacteria;Firmicutes;Clostridia;Clostridiales;Ruminococcaceae;Ruminiclostridium_6	210	391	1388	698	541	416	83	144	74	2020	0.3612	0.4934	1.6472	1.0663	0.7334	0.5411	0.1069	0.2047	0.1166	2.8727
Bacteria;Bacteroidetes;Bacteroidia;Bacteroidales;Prevotellaceae;Alloprevotella	441	85	1208	947	187	726	651	483	224	370	0.7586	0.1073	1.4336	1.4467	0.2535	0.9443	0.8383	0.6868	0.3529	0.5262
Bacteria;Firmicutes;Clostridia;Clostridiales;Ruminococcaceae;Ruminococcaceae_UCG-013	534	561	548	128	210	1736	131	379	248	832	0.9186	0.708	0.6503	0.1955	0.2847	2.2579	0.1687	0.5389	0.3908	1.1832
Bacteria;Firmicutes;Clostridia;Clostridiales;Lachnospiraceae;Blautia	170	490	160	458	549	397	844	366	683	206	0.2924	0.6184	0.1899	0.6997	0.7443	0.5164	1.0868	0.5204	1.0762	0.293
Bacteria;Firmicutes;Erysipelotrichia;Erysipelotrichales;Erysipelotrichaceae;Turicibacter	457	551	750	162	180	560	324	360	349	388	0.7861	0.6953	0.8901	0.2475	0.244	0.7284	0.4172	0.5119	0.5499	0.5518
Bacteria;Firmicutes;Clostridia;Clostridiales;Ruminococcaceae;Intestinimonas	208	170	238	162	130	796	230	800	137	926	0.3578	0.2145	0.2824	0.2475	0.1762	1.0353	0.2962	1.1375	0.2159	1.3169
Archaea;Euryarchaeota;Methanobacteria;Methanobacteriales;Methanobacteriaceae;Methanobrevibacter	182	1571	197	264	1458	0	0	10	1	3	0.3131	1.9825	0.2338	0.4033	1.9766	0	0	0.0142	0.0016	0.0043
Bacteria;Actinobacteria;Actinobacteria;Bifidobacteriales;Bifidobacteriaceae;Bifidobacterium	30	131	61	5	17	379	508	767	901	265	0.0516	0.1653	0.0724	0.0076	0.023	0.493	0.6541	1.0906	1.4197	0.3769
Bacteria;Proteobacteria;Deltaproteobacteria;Desulfovibrionales;Desulfovibrionaceae;Desulfovibrio	385	202	442	259	367	156	42	166	22	958	0.6623	0.2549	0.5245	0.3957	0.4975	0.2029	0.0541	0.236	0.0347	1.3624
Bacteria;Bacteroidetes;Bacteroidia;Bacteroidales;Prevotellaceae;Prevotellaceae_Ga6A1_group	41	98	145	7	92	213	454	1031	513	67	0.0705	0.1237	0.1721	0.0107	0.1247	0.277	0.5846	1.4659	0.8083	0.0953
Bacteria;Proteobacteria;Gammaproteobacteria;Betaproteobacteriales;Burkholderiaceae;Parasutterella	90	88	77	144	123	462	207	430	308	610	0.1548	0.1111	0.0914	0.22	0.1667	0.6009	0.2665	0.6114	0.4853	0.8675
Bacteria;Proteobacteria;Gammaproteobacteria;Enterobacteriales;Enterobacteriaceae;Escherichia-Shigella	67	92	135	87	57	199	218	836	478	254	0.1153	0.1161	0.1602	0.1329	0.0773	0.2588	0.2807	1.1887	0.7532	0.3612
Bacteria;Firmicutes;Clostridia;Clostridiales;Lachnospiraceae;Roseburia	163	33	69	162	67	510	237	193	89	893	0.2804	0.0416	0.0819	0.2475	0.0908	0.6633	0.3052	0.2744	0.1402	1.2699
Bacteria;Firmicutes;Clostridia;Clostridiales;Ruminococcaceae;Ruminiclostridium_5	312	363	270	215	379	214	137	213	43	271	0.5367	0.4581	0.3204	0.3284	0.5138	0.2783	0.1764	0.3029	0.0678	0.3854
Bacteria;Actinobacteria;Actinobacteria;Corynebacteriales;Corynebacteriaceae;Corynebacterium_1	68	46	45	30	25	239	31	1243	427	152	0.117	0.058	0.0534	0.0458	0.0339	0.3109	0.0399	1.7674	0.6728	0.2162
Bacteria;Firmicutes;Bacilli;Lactobacillales;Streptococcaceae;Streptococcus	242	85	291	430	873	150	121	53	32	67	0.4163	0.1073	0.3453	0.6569	1.1835	0.1951	0.1558	0.0754	0.0504	0.0953
Bacteria;Patescibacteria;Saccharimonadia;Saccharimonadales;Saccharimonadaceae;Candidatus_Saccharimonas	117	366	470	96	274	268	16	238	29	116	0.2013	0.4619	0.5578	0.1467	0.3715	0.3486	0.0206	0.3384	0.0457	0.165
Bacteria;Firmicutes;Clostridia;Clostridiales;Ruminococcaceae;Oscillibacter	97	43	211	158	89	437	60	241	46	533	0.1669	0.0543	0.2504	0.2414	0.1207	0.5684	0.0773	0.3427	0.0725	0.758
Bacteria;Bacteroidetes;Bacteroidia;Bacteroidales;Tannerellaceae;Parabacteroides	62	45	49	34	26	513	278	392	340	139	0.1066	0.0568	0.0582	0.0519	0.0352	0.6672	0.358	0.5574	0.5357	0.1977
Bacteria;Firmicutes;Erysipelotrichia;Erysipelotrichales;Erysipelotrichaceae;Dubosiella	175	442	46	12	103	345	76	193	155	339	0.301	0.5578	0.0546	0.0183	0.1396	0.4487	0.0979	0.2744	0.2442	0.4821
Bacteria;Firmicutes;Clostridia;Clostridiales;Ruminococcaceae;Ruminococcaceae_UCG-008	19	31	35	175	289	6	1116	36	187	17	0.0327	0.0391	0.0415	0.2673	0.3918	0.0078	1.437	0.0512	0.2946	0.0242
Bacteria;Firmicutes;Clostridia;Clostridiales;Ruminococcaceae;Ruminococcaceae_UCG-010	206	138	287	65	91	173	61	120	113	88	0.3544	0.1742	0.3406	0.0993	0.1234	0.225	0.0785	0.1706	0.1781	0.1251
Bacteria;Firmicutes;Clostridia;Clostridiales;Lachnospiraceae;Eubacterium_ruminantium_group	43	3	34	1	5	356	136	136	138	479	0.074	0.0038	0.0403	0.0015	0.0068	0.463	0.1751	0.1934	0.2174	0.6812
Bacteria;Bacteroidetes;Bacteroidia;Bacteroidales;Prevotellaceae;Prevotellaceae_UCG-001	70	91	391	156	147	125	58	90	92	24	0.1204	0.1148	0.464	0.2383	0.1993	0.1626	0.0747	0.128	0.145	0.0341
Bacteria;Actinobacteria;Coriobacteriia;Coriobacteriales;Eggerthellaceae;Enterorhabdus	96	69	131	52	99	168	120	174	106	147	0.1651	0.0871	0.1555	0.0794	0.1342	0.2185	0.1545	0.2474	0.167	0.209
Bacteria;Proteobacteria;Gammaproteobacteria;Betaproteobacteriales;Burkholderiaceae;Sutterella	58	72	91	141	41	51	137	76	378	53	0.0998	0.0909	0.108	0.2154	0.0556	0.0663	0.1764	0.1081	0.5956	0.0754
Bacteria;Firmicutes;Clostridia;Clostridiales;Lachnospiraceae;Lachnospiraceae_UCG-010	6	4	6	11	11	319	68	301	331	54	0.0103	0.005	0.0071	0.0168	0.0149	0.4149	0.0876	0.428	0.5215	0.0768
Bacteria;Firmicutes;Clostridia;Clostridiales;Family_XIII;Eubacterium_nodatum_group	41	126	247	143	73	236	64	58	77	70	0.0705	0.159	0.2931	0.2185	0.099	0.307	0.0824	0.0825	0.1213	0.0995
Bacteria;Bacteroidetes;Bacteroidia;Bacteroidales;Rikenellaceae;Alistipes	128	60	41	97	80	191	26	106	67	152	0.2202	0.0757	0.0487	0.1482	0.1085	0.2484	0.0335	0.1507	0.1056	0.2162
Bacteria;Firmicutes;Erysipelotrichia;Erysipelotrichales;Erysipelotrichaceae;Allobaculum	53	168	22	20	32	97	115	95	177	139	0.0912	0.212	0.0261	0.0306	0.0434	0.1262	0.1481	0.1351	0.2789	0.1977
Bacteria;Firmicutes;Clostridia;Clostridiales;Family_XIII;Anaerovorax	120	49	248	210	193	19	3	31	4	10	0.2064	0.0618	0.2943	0.3208	0.2616	0.0247	0.0039	0.0441	0.0063	0.0142
Bacteria;Firmicutes;Clostridia;Clostridiales;Lachnospiraceae;Lachnoclostridium	243	124	195	31	57	46	17	21	8	99	0.418	0.1565	0.2314	0.0474	0.0773	0.0598	0.0219	0.0299	0.0126	0.1408
Bacteria;Firmicutes;Clostridia;Clostridiales;Lachnospiraceae;Marvinbryantia	46	188	116	114	316	15	13	14	12	14	0.0791	0.2372	0.1377	0.1742	0.4284	0.0195	0.0167	0.0199	0.0189	0.0199
Bacteria;Firmicutes;Clostridia;Clostridiales;Ruminococcaceae;Papillibacter	94	26	18	92	65	226	26	62	20	130	0.1617	0.0328	0.0214	0.1405	0.0881	0.294	0.0335	0.0882	0.0315	0.1849
Bacteria;Firmicutes;Bacilli;Lactobacillales;Aerococcaceae;Aerococcus	1	8	2	0	7	27	7	373	210	43	0.0017	0.0101	0.0024	0	0.0095	0.0351	0.009	0.5304	0.3309	0.0612
Bacteria;Firmicutes;Clostridia;Clostridiales;Lachnospiraceae;Butyrivibrio	12	4	1	2	2	123	0	477	7	33	0.0206	0.005	0.0012	0.0031	0.0027	0.16	0	0.6782	0.011	0.0469
Bacteria;Firmicutes;Clostridia;Clostridiales;Lachnospiraceae;Eubacterium_xylanophilum_group	39	33	98	34	75	173	32	110	36	30	0.0671	0.0416	0.1163	0.0519	0.1017	0.225	0.0412	0.1564	0.0567	0.0427
Bacteria;Actinobacteria;Coriobacteriia;Coriobacteriales;Eggerthellaceae;DNF00809	74	76	106	86	147	30	12	59	14	29	0.1273	0.0959	0.1258	0.1314	0.1993	0.039	0.0155	0.0839	0.0221	0.0412
Bacteria;Firmicutes;Clostridia;Clostridiales;Ruminococcaceae;Ruminococcaceae_UCG-007	63	104	109	126	94	6	4	19	4	54	0.1084	0.1312	0.1294	0.1925	0.1274	0.0078	0.0052	0.027	0.0063	0.0768
Bacteria;Firmicutes;Clostridia;Clostridiales;Lachnospiraceae;Fusicatenibacter	1	6	4	112	73	9	234	5	18	14	0.0017	0.0076	0.0047	0.1711	0.099	0.0117	0.3013	0.0071	0.0284	0.0199
Bacteria;Actinobacteria;Coriobacteriia;Coriobacteriales;Atopobiaceae;Coriobacteriaceae_UCG-002	10	66	5	0	29	112	29	85	75	50	0.0172	0.0833	0.0059	0	0.0393	0.1457	0.0373	0.1209	0.1182	0.0711
Bacteria;Actinobacteria;Coriobacteriia;Coriobacteriales;Eggerthellaceae;Adlercreutzia	30	67	10	18	29	27	29	136	60	26	0.0516	0.0846	0.0119	0.0275	0.0393	0.0351	0.0373	0.1934	0.0945	0.037
Bacteria;Firmicutes;Clostridia;Clostridiales;Ruminococcaceae;Candidatus_Soleaferrea	37	71	75	22	72	91	40	8	16	18	0.0636	0.0896	0.089	0.0336	0.0976	0.1184	0.0515	0.0114	0.0252	0.0256
Bacteria;Epsilonbacteraeota;Campylobacteria;Campylobacterales;Helicobacteraceae;Helicobacter	8	14	6	15	8	20	77	191	37	20	0.0138	0.0177	0.0071	0.0229	0.0108	0.026	0.0991	0.2716	0.0583	0.0284
Bacteria;Firmicutes;Erysipelotrichia;Erysipelotrichales;Erysipelotrichaceae;Erysipelatoclostridium	27	23	22	68	47	26	50	13	53	9	0.0464	0.029	0.0261	0.1039	0.0637	0.0338	0.0644	0.0185	0.0835	0.0128
Bacteria;Firmicutes;Erysipelotrichia;Erysipelotrichales;Erysipelotrichaceae;Erysipelotrichaceae_UCG-003	18	28	14	119	112	10	22	7	3	1	0.031	0.0353	0.0166	0.1818	0.1518	0.013	0.0283	0.01	0.0047	0.0014
Bacteria;Bacteroidetes;Bacteroidia;Bacteroidales;Prevotellaceae;Paraprevotella	5	7	2	26	9	3	130	50	85	3	0.0086	0.0088	0.0024	0.0397	0.0122	0.0039	0.1674	0.0711	0.1339	0.0043
Bacteria;Firmicutes;Clostridia;Clostridiales;Ruminococcaceae;GCA-900066225	7	26	11	6	4	103	62	22	43	44	0.012	0.0328	0.0131	0.0092	0.0054	0.134	0.0798	0.0313	0.0678	0.0626
Bacteria;Firmicutes;Erysipelotrichia;Erysipelotrichales;Erysipelotrichaceae;Candidatus_Stoquefichus	10	40	19	12	65	11	109	9	27	3	0.0172	0.0505	0.0225	0.0183	0.0881	0.0143	0.1404	0.0128	0.0425	0.0043
Bacteria;Firmicutes;Clostridia;Clostridiales;Lachnospiraceae;GCA-900066575	38	5	16	41	41	17	8	14	12	78	0.0654	0.0063	0.019	0.0626	0.0556	0.0221	0.0103	0.0199	0.0189	0.1109
Bacteria;Firmicutes;Clostridia;Clostridiales;Defluviitaleaceae;Defluviitaleaceae_UCG-011	22	52	59	17	37	31	19	22	13	13	0.0378	0.0656	0.07	0.026	0.0502	0.0403	0.0245	0.0313	0.0205	0.0185
Bacteria;Firmicutes;Clostridia;Clostridiales;Family_XIII;Family_XIII_AD3011_group	14	13	12	8	5	87	3	59	12	41	0.0241	0.0164	0.0142	0.0122	0.0068	0.1132	0.0039	0.0839	0.0189	0.0583
Bacteria;Firmicutes;Bacilli;Lactobacillales;Enterococcaceae;Vagococcus	1	1	1	1	0	28	0	70	86	11	0.0017	0.0013	0.0012	0.0015	0	0.0364	0	0.0995	0.1355	0.0156
Bacteria;Firmicutes;Bacilli;Bacillales;Staphylococcaceae;Jeotgalicoccus	7	2	7	2	0	15	3	102	39	23	0.012	0.0025	0.0083	0.0031	0	0.0195	0.0039	0.145	0.0614	0.0327
Bacteria;Firmicutes;Clostridia;Clostridiales;Ruminococcaceae;Ruminococcaceae_UCG-009	34	5	26	10	28	32	25	15	10	19	0.0585	0.0063	0.0309	0.0153	0.038	0.0416	0.0322	0.0213	0.0158	0.027
Bacteria;Actinobacteria;Actinobacteria;Micrococcales;Micrococcaceae;Rothia	14	14	9	43	44	48	7	4	14	4	0.0241	0.0177	0.0107	0.0657	0.0597	0.0624	0.009	0.0057	0.0221	0.0057
Bacteria;Firmicutes;Clostridia;Clostridiales;Lachnospiraceae;Ruminococcus_torques_group	9	8	2	4	12	6	77	16	50	8	0.0155	0.0101	0.0024	0.0061	0.0163	0.0078	0.0992	0.0228	0.0788	0.0114
Bacteria;Firmicutes;Clostridia;Clostridiales;Ruminococcaceae;Fournierella	9	14	14	22	15	8	58	13	17	9	0.0155	0.0177	0.0166	0.0336	0.0203	0.0104	0.0747	0.0185	0.0268	0.0128
Bacteria;Bacteroidetes;Bacteroidia;Bacteroidales;Marinifilaceae;Butyricimonas	10	5	21	17	4	21	6	29	38	19	0.0172	0.0063	0.0249	0.026	0.0054	0.0273	0.0077	0.0412	0.0599	0.027
Bacteria;Firmicutes;Bacilli;Lactobacillales;Aerococcaceae;Facklamia	2	3	0	0	0	3	1	25	104	10	0.0034	0.0038	0	0	0	0.0039	0.0013	0.0355	0.1639	0.0142
Bacteria;Bacteroidetes;Bacteroidia;Bacteroidales;Barnesiellaceae;Barnesiella	30	40	7	6	10	10	3	18	20	7	0.0516	0.0505	0.0083	0.0092	0.0136	0.013	0.0039	0.0256	0.0315	0.01
Bacteria;Firmicutes;Clostridia;Clostridiales;Ruminococcaceae;Oscillospira	2	4	3	3	2	2	115	7	18	5	0.0034	0.005	0.0036	0.0046	0.0027	0.0026	0.1481	0.01	0.0284	0.0071
Bacteria;Firmicutes;Clostridia;Clostridiales;Lachnospiraceae;Coprococcus_2	7	4	4	6	5	7	8	34	51	20	0.012	0.005	0.0047	0.0092	0.0068	0.0091	0.0103	0.0483	0.0804	0.0284
Bacteria;Firmicutes;Clostridia;Clostridiales;Ruminococcaceae;UBA1819	8	14	8	4	1	36	22	27	7	23	0.0138	0.0177	0.0095	0.0061	0.0014	0.0468	0.0283	0.0384	0.011	0.0327
Bacteria;Firmicutes;Clostridia;Clostridiales;Lachnospiraceae;Tyzzerella	46	9	4	8	13	2	0	8	3	27	0.0791	0.0114	0.0047	0.0122	0.0176	0.0026	0	0.0114	0.0047	0.0384
Bacteria;Firmicutes;Clostridia;Clostridiales;Eubacteriaceae;Anaerofustis	0	1	5	5	1	39	63	11	6	6	0	0.0013	0.0059	0.0076	0.0014	0.0507	0.0811	0.0156	0.0095	0.0085
Bacteria;Proteobacteria;Gammaproteobacteria;Pseudomonadales;Moraxellaceae;Psychrobacter	1	5	15	0	1	5	0	67	23	11	0.0017	0.0063	0.0178	0	0.0014	0.0065	0	0.0953	0.0362	0.0156
Bacteria;Firmicutes;Erysipelotrichia;Erysipelotrichales;Erysipelotrichaceae;Faecalitalea	10	18	19	7	11	20	15	7	19	3	0.0172	0.0227	0.0225	0.0107	0.0149	0.026	0.0193	0.01	0.0299	0.0043
Archaea;Euryarchaeota;Methanobacteria;Methanobacteriales;Methanobacteriaceae;Methanosphaera	6	59	17	3	44	0	0	0	0	0	0.0103	0.0745	0.0202	0.0046	0.0597	0	0	0	0	0
Bacteria;Firmicutes;Clostridia;Clostridiales;Lachnospiraceae;Sellimonas	2	1	0	6	7	13	32	17	29	10	0.0034	0.0013	0	0.0092	0.0095	0.0169	0.0412	0.0242	0.0457	0.0142
Bacteria;Firmicutes;Clostridia;Clostridiales;Ruminococcaceae;Anaerotruncus	4	3	7	15	43	10	2	6	6	19	0.0069	0.0038	0.0083	0.0229	0.0583	0.013	0.0026	0.0085	0.0095	0.027
Bacteria;Firmicutes;Clostridia;Clostridiales;Lachnospiraceae;Lachnospiraceae_UCG-006	6	14	9	3	2	31	5	2	2	31	0.0103	0.0177	0.0107	0.0046	0.0027	0.0403	0.0064	0.0028	0.0032	0.0441
Bacteria;Firmicutes;Negativicutes;Selenomonadales;Veillonellaceae;Veillonella	6	12	18	3	0	10	4	17	8	22	0.0103	0.0151	0.0214	0.0046	0	0.013	0.0052	0.0242	0.0126	0.0313
Bacteria;Firmicutes;Clostridia;Clostridiales;Lachnospiraceae;Bacteroides_pectinophilus_group	2	4	4	23	4	55	0	0	0	3	0.0034	0.005	0.0047	0.0351	0.0054	0.0715	0	0	0	0.0043
Bacteria;Bacteroidetes;Bacteroidia;Bacteroidales;Marinifilaceae;Odoribacter	0	4	0	4	9	0	18	28	19	6	0	0.005	0	0.0061	0.0122	0	0.0232	0.0398	0.0299	0.0085
Bacteria;Firmicutes;Clostridia;Clostridiales;Ruminococcaceae;Pygmaiobacter	5	0	1	3	3	10	3	8	5	48	0.0086	0	0.0012	0.0046	0.0041	0.013	0.0039	0.0114	0.0079	0.0683
Bacteria;Firmicutes;Clostridia;Clostridiales;Ruminococcaceae;Butyricicoccus	4	11	2	6	0	15	10	14	4	17	0.0069	0.0139	0.0024	0.0092	0	0.0195	0.0129	0.0199	0.0063	0.0242
Bacteria;Firmicutes;Clostridia;Clostridiales;Ruminococcaceae;Faecalibacterium	4	7	4	7	3	10	30	6	8	5	0.0069	0.0088	0.0047	0.0107	0.0041	0.013	0.0386	0.0085	0.0126	0.0071
Bacteria;Firmicutes;Clostridia;Clostridiales;Ruminococcaceae;Ruminiclostridium	17	5	1	10	25	4	0	1	1	1	0.0292	0.0063	0.0012	0.0153	0.0339	0.0052	0	0.0014	0.0016	0.0014
Bacteria;Firmicutes;Clostridia;Clostridiales;Ruminococcaceae;Harryflintia	13	0	2	2	0	10	3	11	6	15	0.0224	0	0.0024	0.0031	0	0.013	0.0039	0.0156	0.0095	0.0213
Bacteria;Firmicutes;Clostridia;Clostridiales;Lachnospiraceae;Shuttleworthia	2	3	0	2	7	4	23	3	14	6	0.0034	0.0038	0	0.0031	0.0095	0.0052	0.0296	0.0043	0.0221	0.0085
Bacteria;Firmicutes;Clostridia;Clostridiales;Family_XIII;Family_XIII_UCG-001	0	6	13	1	1	4	1	7	1	29	0	0.0076	0.0154	0.0015	0.0014	0.0052	0.0013	0.01	0.0016	0.0412
Bacteria;Firmicutes;Erysipelotrichia;Erysipelotrichales;Erysipelotrichaceae;Holdemania	0	0	3	0	8	19	5	9	16	1	0	0	0.0036	0	0.0108	0.0247	0.0064	0.0128	0.0252	0.0014
Bacteria;Bacteroidetes;Bacteroidia;Bacteroidales;Prevotellaceae;Prevotellaceae_NK3B31_group	11	16	3	4	14	2	0	3	4	0	0.0189	0.0202	0.0036	0.0061	0.019	0.0026	0	0.0043	0.0063	0
Bacteria;Firmicutes;Clostridia;Clostridiales;Ruminococcaceae;Flavonifractor	0	0	2	2	3	1	15	15	5	11	0	0	0.0024	0.0031	0.0041	0.0013	0.0193	0.0213	0.0079	0.0156
Bacteria;Firmicutes;Clostridia;Clostridiales;Lachnospiraceae;Lachnospiraceae_NK4B4_group	3	1	2	3	0	14	13	7	2	9	0.0052	0.0013	0.0024	0.0046	0	0.0182	0.0167	0.01	0.0032	0.0128
Bacteria;Firmicutes;Clostridia;Clostridiales;Lachnospiraceae;Eisenbergiella	1	2	4	0	8	11	4	7	3	12	0.0017	0.0025	0.0047	0	0.0108	0.0143	0.0052	0.01	0.0047	0.0171
Bacteria;Proteobacteria;Gammaproteobacteria;Enterobacteriales;Enterobacteriaceae;Proteus	2	1	0	1	2	2	0	29	9	1	0.0034	0.0013	0	0.0015	0.0027	0.0026	0	0.0412	0.0142	0.0014
Bacteria;Firmicutes;Clostridia;Clostridiales;Peptococcaceae;Peptococcus	3	0	6	8	1	5	5	1	3	8	0.0052	0	0.0071	0.0122	0.0014	0.0065	0.0064	0.0014	0.0047	0.0114
Bacteria;Firmicutes;Clostridia;Clostridiales;Lachnospiraceae;A2	6	0	17	0	13	0	0	0	0	4	0.0103	0	0.0202	0	0.0176	0	0	0	0	0.0057
Bacteria;Firmicutes;Clostridia;Clostridiales;Ruminococcaceae;DTU089	3	4	2	0	6	3	7	1	11	0	0.0052	0.005	0.0024	0	0.0081	0.0039	0.009	0.0014	0.0173	0
Bacteria;Firmicutes;Clostridia;Clostridiales;Lachnospiraceae;Lachnospiraceae_ND3007_group	0	1	0	11	7	2	6	2	5	2	0	0.0013	0	0.0168	0.0095	0.0026	0.0077	0.0028	0.0079	0.0028
Bacteria;Bacteroidetes;Bacteroidia;Bacteroidales;Prevotellaceae;Prevotellaceae_UCG-003	2	11	2	1	3	0	1	8	4	3	0.0034	0.0139	0.0024	0.0015	0.0041	0	0.0013	0.0114	0.0063	0.0043
Bacteria;Firmicutes;Clostridia;Clostridiales;Ruminococcaceae;Phocea	6	0	0	2	1	8	6	4	5	0	0.0103	0	0	0.0031	0.0014	0.0104	0.0077	0.0057	0.0079	0
Bacteria;Firmicutes;Bacilli;Lactobacillales;Enterococcaceae;Enterococcus	3	3	3	3	5	2	1	4	6	2	0.0052	0.0038	0.0036	0.0046	0.0068	0.0026	0.0013	0.0057	0.0095	0.0028
Bacteria;Proteobacteria;Deltaproteobacteria;Desulfovibrionales;Desulfovibrionaceae;Bilophila	3	1	0	2	3	5	0	1	1	15	0.0052	0.0013	0	0.0031	0.0041	0.0065	0	0.0014	0.0016	0.0213
Bacteria;Firmicutes;Erysipelotrichia;Erysipelotrichales;Erysipelotrichaceae;Holdemanella	0	0	0	14	6	1	9	0	0	0	0	0	0	0.0214	0.0081	0.0013	0.0116	0	0	0
Bacteria;Firmicutes;Clostridia;Clostridiales;Lachnospiraceae;Acetatifactor	0	0	0	0	0	8	0	3	1	18	0	0	0	0	0	0.0104	0	0.0043	0.0016	0.0256
Bacteria;Proteobacteria;Gammaproteobacteria;Aeromonadales;Aeromonadaceae;Aeromonas	0	9	0	0	21	1	0	0	0	0	0	0.0114	0	0	0.0285	0.0013	0	0	0	0
Bacteria;Actinobacteria;Coriobacteriia;Coriobacteriales;Eggerthellaceae;Parvibacter	1	10	0	3	0	8	1	2	3	1	0.0017	0.0126	0	0.0046	0	0.0104	0.0013	0.0028	0.0047	0.0014
Bacteria;Firmicutes;Clostridia;Clostridiales;Family_XIII;Eubacterium_brachy_group	2	2	3	3	4	0	0	0	3	10	0.0034	0.0025	0.0036	0.0046	0.0054	0	0	0	0.0047	0.0142
Bacteria;Firmicutes;Bacilli;Lactobacillales;Streptococcaceae;Lactococcus	1	0	0	20	3	0	0	1	0	0	0.0017	0	0	0.0306	0.0041	0	0	0.0014	0	0
Bacteria;Firmicutes;Clostridia;Clostridiales;Lachnospiraceae;Eubacterium_hallii_group	0	0	0	0	0	4	9	2	10	1	0	0	0	0	0	0.0052	0.0116	0.0028	0.0158	0.0014
Bacteria;Firmicutes;Clostridia;Clostridiales;Ruminococcaceae;Anaerofilum	0	0	0	6	3	3	0	1	3	9	0	0	0	0.0092	0.0041	0.0039	0	0.0014	0.0047	0.0128
Bacteria;Elusimicrobia;Elusimicrobia;Elusimicrobiales;Elusimicrobiaceae;Elusimicrobium	2	16	4	2	0	2	0	0	1	0	0.0034	0.0202	0.0047	0.0031	0	0.0026	0	0	0.0016	0
Bacteria;Firmicutes;Bacilli;Bacillales;Planococcaceae;Sporosarcina	0	0	0	0	0	0	0	13	9	2	0	0	0	0	0	0	0	0.0185	0.0142	0.0028
Bacteria;Proteobacteria;Gammaproteobacteria;Pseudomonadales;Moraxellaceae;Acinetobacter	1	0	0	0	10	1	1	5	0	1	0.0017	0	0	0	0.0136	0.0013	0.0013	0.0071	0	0.0014
Bacteria;Proteobacteria;Gammaproteobacteria;Pasteurellales;Pasteurellaceae;Rodentibacter	4	0	2	0	1	3	0	0	4	2	0.0069	0	0.0024	0	0.0014	0.0039	0	0	0.0063	0.0028
Bacteria;Actinobacteria;Actinobacteria;Micrococcales;Micrococcaceae;Micrococcus	0	0	0	0	17	0	0	0	0	0	0	0	0	0	0.023	0	0	0	0	0
Bacteria;Firmicutes;Clostridia;Clostridiales;Christensenellaceae;Catabacter	6	0	1	2	1	4	0	1	0	0	0.0103	0	0.0012	0.0031	0.0014	0.0052	0	0.0014	0	0
Bacteria;Firmicutes;Bacilli;Bacillales;Staphylococcaceae;Staphylococcus	0	0	0	2	1	1	5	0	6	0	0	0	0	0.0031	0.0014	0.0013	0.0064	0	0.0095	0
Bacteria;Firmicutes;Negativicutes;Selenomonadales;Veillonellaceae;Allisonella	0	0	0	1	0	1	11	0	2	0	0	0	0	0.0015	0	0.0013	0.0142	0	0.0032	0
Bacteria;Deferribacteres;Deferribacteres;Deferribacterales;Deferribacteraceae;Mucispirillum	0	2	0	2	2	3	0	0	0	5	0	0.0025	0	0.0031	0.0027	0.0039	0	0	0	0.0071
Bacteria;Proteobacteria;Gammaproteobacteria;Pseudomonadales;Pseudomonadaceae;Pseudomonas	1	0	0	3	2	0	1	4	2	0	0.0017	0	0	0.0046	0.0027	0	0.0013	0.0057	0.0032	0
Bacteria;Firmicutes;Clostridia;Clostridiales;Lachnospiraceae;Eubacterium_ventriosum_group	0	0	4	5	2	0	2	0	0	1	0	0	0.0047	0.0076	0.0027	0	0.0026	0	0	0.0014
Bacteria;Firmicutes;Clostridia;Clostridiales;Lachnospiraceae;ASF356	2	4	0	4	1	0	0	0	0	0	0.0034	0.005	0	0.0061	0.0014	0	0	0	0	0
Bacteria;Firmicutes;Clostridia;Clostridiales;Ruminococcaceae;Caproiciproducens	2	1	0	0	0	0	0	1	6	0	0.0034	0.0013	0	0	0	0	0	0.0014	0.0095	0
Bacteria;Firmicutes;Bacilli;Bacillales;Planococcaceae;Kurthia	0	1	1	0	0	0	0	3	4	1	0	0.0013	0.0012	0	0	0	0	0.0043	0.0063	0.0014
Bacteria;Actinobacteria;Actinobacteria;Actinomycetales;Actinomycetaceae;Actinomyces	0	0	0	0	4	1	1	0	3	1	0	0	0	0	0.0054	0.0013	0.0013	0	0.0047	0.0014
Bacteria;Firmicutes;Bacilli;Lactobacillales;Carnobacteriaceae;Atopostipes	0	0	0	0	0	1	0	7	1	0	0	0	0	0	0	0.0013	0	0.01	0.0016	0
Bacteria;Firmicutes;Erysipelotrichia;Erysipelotrichales;Erysipelotrichaceae;Faecalibaculum	0	1	0	0	1	2	0	3	1	1	0	0.0013	0	0	0.0014	0.0026	0	0.0043	0.0016	0.0014
Bacteria;Firmicutes;Clostridia;Clostridiales;Lachnospiraceae;Eubacterium_oxidoreducens_group	0	0	1	2	0	2	1	1	0	2	0	0	0.0012	0.0031	0	0.0026	0.0013	0.0014	0	0.0028
Bacteria;Actinobacteria;Acidimicrobiia;Microtrichales;Iamiaceae;Iamia	0	9	0	0	0	0	0	0	0	0	0	0.0114	0	0	0	0	0	0	0	0
Bacteria;Proteobacteria;Alphaproteobacteria;Rhizobiales;Xanthobacteraceae;Bradyrhizobium	0	2	3	0	0	1	1	1	0	0	0	0.0025	0.0036	0	0	0.0013	0.0013	0.0014	0	0
Bacteria;Proteobacteria;Gammaproteobacteria;Enterobacteriales;Enterobacteriaceae;Enterobacter	1	0	1	0	0	1	0	3	1	0	0.0017	0	0.0012	0	0	0.0013	0	0.0043	0.0016	0
Bacteria;Proteobacteria;Gammaproteobacteria;Enterobacteriales;Enterobacteriaceae;Morganella	1	0	0	0	0	0	3	0	2	0	0.0017	0	0	0	0	0	0.0039	0	0.0032	0
Bacteria;Tenericutes;Mollicutes;Anaeroplasmatales;Anaeroplasmataceae;Anaeroplasma	0	0	0	0	0	0	0	1	0	5	0	0	0	0	0	0	0	0.0014	0	0.0071
Bacteria;Firmicutes;Bacilli;Lactobacillales;Leuconostocaceae;Weissella	0	0	0	0	6	0	0	0	0	0	0	0	0	0	0.0081	0	0	0	0	0
Bacteria;Bacteroidetes;Bacteroidia;Bacteroidales;Muribaculaceae;Muribaculum	0	0	0	2	0	1	0	0	1	1	0	0	0	0.0031	0	0.0013	0	0	0.0016	0.0014
Bacteria;Proteobacteria;Alphaproteobacteria;Caulobacterales;Caulobacteraceae;Brevundimonas	0	0	1	0	2	0	0	0	2	0	0	0	0.0012	0	0.0027	0	0	0	0.0032	0
Bacteria;Firmicutes;Bacilli;Lactobacillales;Aerococcaceae;Globicatella	0	0	0	0	0	3	0	0	2	0	0	0	0	0	0	0.0039	0	0	0.0032	0
Bacteria;Proteobacteria;Gammaproteobacteria;Xanthomonadales;Xanthomonadaceae;Stenotrophomonas	0	0	0	1	4	0	0	0	0	0	0	0	0	0.0015	0.0054	0	0	0	0	0
Bacteria;Proteobacteria;Gammaproteobacteria;Betaproteobacteriales;Burkholderiaceae;Curvibacter	1	2	1	0	1	0	0	0	0	0	0.0017	0.0025	0.0012	0	0.0014	0	0	0	0	0
Bacteria;Proteobacteria;Gammaproteobacteria;Alteromonadales;Psychromonadaceae;Psychromonas	0	2	2	1	0	0	0	0	0	0	0	0.0025	0.0024	0.0015	0	0	0	0	0	0
Bacteria;Firmicutes;Clostridia;Clostridiales;Clostridiaceae_1;Candidatus_Arthromitus	0	0	0	1	1	0	0	0	2	0	0	0	0	0.0015	0.0014	0	0	0	0.0032	0
Bacteria;Firmicutes;Erysipelotrichia;Erysipelotrichales;Erysipelotrichaceae;Erysipelotrichaceae_UCG-004	0	0	0	0	0	0	0	3	1	0	0	0	0	0	0	0	0	0.0043	0.0016	0
Bacteria;Firmicutes;Clostridia;Clostridiales;Ruminococcaceae;Angelakisella	0	0	0	0	0	0	0	0	0	4	0	0	0	0	0	0	0	0	0	0.0057
Bacteria;Firmicutes;Bacilli;Bacillales;Planococcaceae;Savagea	0	1	0	0	0	0	0	3	0	0	0	0.0013	0	0	0	0	0	0.0043	0	0
Bacteria;Proteobacteria;Gammaproteobacteria;Oceanospirillales;Halomonadaceae;Halomonas	0	0	0	3	0	0	0	0	0	0	0	0	0	0.0046	0	0	0	0	0	0
Bacteria;Firmicutes;Clostridia;Clostridiales;Lachnospiraceae;Lachnospiraceae_UCG-004	0	0	0	1	0	0	0	1	1	0	0	0	0	0.0015	0	0	0	0.0014	0.0016	0
Bacteria;Lentisphaerae;Lentisphaeria;Victivallales;Victivallaceae;Victivallis	0	0	0	0	0	0	0	2	1	0	0	0	0	0	0	0	0	0.0028	0.0016	0
Bacteria;Firmicutes;Clostridia;Clostridiales;Christensenellaceae;Christensenella	1	0	0	0	1	1	0	0	0	0	0.0017	0	0	0	0.0014	0.0013	0	0	0	0
Bacteria;Proteobacteria;Alphaproteobacteria;Caulobacterales;Caulobacteraceae;Caulobacter	0	0	0	0	1	0	2	0	0	0	0	0	0	0	0.0014	0	0.0026	0	0	0
Bacteria;Firmicutes;Erysipelotrichia;Erysipelotrichales;Erysipelotrichaceae;Firmicutes_bacterium_CAG:345	0	0	0	0	0	3	0	0	0	0	0	0	0	0	0	0.0039	0	0	0	0
Bacteria;Proteobacteria;Alphaproteobacteria;Dongiales;Dongiaceae;Dongia	0	0	3	0	0	0	0	0	0	0	0	0	0.0036	0	0	0	0	0	0	0
Bacteria;Firmicutes;Clostridia;Clostridiales;Peptostreptococcaceae;Clostridioides	1	0	0	0	0	1	0	0	0	0	0.0017	0	0	0	0	0.0013	0	0	0	0
Bacteria;Proteobacteria;Gammaproteobacteria;Enterobacteriales;Enterobacteriaceae;Providencia	0	0	0	0	0	0	0	2	0	0	0	0	0	0	0	0	0	0.0028	0	0
Bacteria;Proteobacteria;Gammaproteobacteria;Acidiferrobacterales;Acidiferrobacteraceae;Sulfurifustis	0	0	0	0	0	0	0	2	0	0	0	0	0	0	0	0	0	0.0028	0	0
Bacteria;Proteobacteria;Gammaproteobacteria;Pseudomonadales;Moraxellaceae;Enhydrobacter	0	0	0	0	2	0	0	0	0	0	0	0	0	0	0.0027	0	0	0	0	0
Bacteria;Firmicutes;Clostridia;Clostridiales;Clostridiales_vadinBB60_group;Clostridiales_bacterium_enrichment_culture_clone_06-1235251-76	0	0	0	0	0	2	0	0	0	0	0	0	0	0	0	0.0026	0	0	0	0
Bacteria;Proteobacteria;Gammaproteobacteria;Betaproteobacteriales;Burkholderiaceae;Limnobacter	0	0	1	0	0	0	0	1	0	0	0	0	0.0012	0	0	0	0	0.0014	0	0
Bacteria;Spirochaetes;Spirochaetia;Spirochaetales;Spirochaetaceae;Treponema_2	0	1	0	0	0	1	0	0	0	0	0	0.0013	0	0	0	0.0013	0	0	0	0
Bacteria;Actinobacteria;Actinobacteria;Propionibacteriales;Nocardioidaceae;Nocardioides	0	2	0	0	0	0	0	0	0	0	0	0.0025	0	0	0	0	0	0	0	0
Bacteria;Firmicutes;Bacilli;Bacillales;Bacillaceae;Bacillus	1	0	0	0	0	0	0	0	0	0	0.0017	0	0	0	0	0	0	0	0	0
Bacteria;Proteobacteria;Gammaproteobacteria;Betaproteobacteriales;Burkholderiaceae;Comamonas	0	0	0	0	0	0	0	0	1	0	0	0	0	0	0	0	0	0	0.0016	0
Bacteria;Actinobacteria;Actinobacteria;Micrococcales;Micrococcaceae;Enteractinococcus	0	0	0	0	0	0	0	0	1	0	0	0	0	0	0	0	0	0	0.0016	0
Bacteria;Actinobacteria;Coriobacteriia;Coriobacteriales;Atopobiaceae;Olsenella	0	0	0	1	0	0	0	0	0	0	0	0	0	0.0015	0	0	0	0	0	0
Bacteria;Bacteroidetes;Bacteroidia;Bacteroidales;Prevotellaceae;Prevotella_7	0	0	0	1	0	0	0	0	0	0	0	0	0	0.0015	0	0	0	0	0	0
Bacteria;Firmicutes;Clostridia;Clostridiales;Lachnospiraceae;Coprococcus_1	0	0	0	0	0	0	0	1	0	0	0	0	0	0	0	0	0	0.0014	0	0
Bacteria;Proteobacteria;Alphaproteobacteria;Rhizobiales;Beijerinckiaceae;Methylobacterium	0	0	0	0	1	0	0	0	0	0	0	0	0	0	0.0014	0	0	0	0	0
Bacteria;Proteobacteria;Deltaproteobacteria;Bdellovibrionales;Bdellovibrionaceae;OM27_clade	0	0	0	0	0	0	0	1	0	0	0	0	0	0	0	0	0	0.0014	0	0
Bacteria;Proteobacteria;Alphaproteobacteria;Rhizobiales;Rhizobiaceae;Aureimonas	0	0	0	0	0	0	1	0	0	0	0	0	0	0	0	0	0.0013	0	0	0
Bacteria;Firmicutes;Clostridia;Clostridiales;Lachnospiraceae;Coprococcus_3	0	1	0	0	0	0	0	0	0	0	0	0.0013	0	0	0	0	0	0	0	0
Bacteria;Actinobacteria;Actinobacteria;Frankiales;Geodermatophilaceae;Blastococcus	0	0	1	0	0	0	0	0	0	0	0	0	0.0012	0	0	0	0	0	0	0
Unclassified	33687	23404	29567	24434	29876	28896	18158	29424	18935	23707	57.9471	29.5345	35.0885	37.3261	40.5027	37.584	23.3814	41.8371	29.8349	33.7139

## Sheet: Species
Species	Normal-1_tags	Normal-2_tags	Normal-3_tags	Normal-4_tags	Normal-5_tags	Model-1_tags	Model-2_tags	Model-3_tags	Model-4_tags	Model-5_tags	Normal-1_relative_abundance	Normal-2_relative_abundance	Normal-3_relative_abundance	Normal-4_relative_abundance	Normal-5_relative_abundance	Model-1_relative_abundance	Model-2_relative_abundance	Model-3_relative_abundance	Model-4_relative_abundance	Model-5_relative_abundance
Bacteria;Firmicutes;Bacilli;Lactobacillales;Lactobacillaceae;Lactobacillus;Lactobacillus_acidophilus	2570	8486	922	294	2745	1926	5002	4118	5141	5729	4.4208	10.7088	1.0942	0.4491	3.7214	2.5051	6.4409	5.8553	8.1004	8.1473
Bacteria;Firmicutes;Bacilli;Lactobacillales;Lactobacillaceae;Lactobacillus;Lactobacillus_reuteri	262	2372	1341	1200	2515	3793	3077	2696	4523	3519	0.4507	2.9933	1.5914	1.8332	3.4096	4.9334	3.9621	3.8334	7.1266	5.0044
Bacteria;Firmicutes;Bacilli;Lactobacillales;Lactobacillaceae;Lactobacillus;Lactobacillus_gasseri	658	2230	5104	3781	978	802	1007	1789	3957	1496	1.1319	2.8141	6.0572	5.776	1.3259	1.0431	1.2967	2.5437	6.2348	2.1275
Bacteria;Firmicutes;Clostridia;Clostridiales;Lachnospiraceae;Lachnospiraceae_NK4A136_group;Clostridiales_bacterium_CIEAF_020	36	65	64	80	69	654	22	598	596	4107	0.0619	0.082	0.076	0.1222	0.0935	0.8506	0.0283	0.8503	0.9391	5.8406
Bacteria;Firmicutes;Bacilli;Lactobacillales;Lactobacillaceae;Lactobacillus;Lactobacillus_murinus	450	742	1768	76	213	560	445	418	691	133	0.7741	0.9364	2.0982	0.1161	0.2888	0.7284	0.573	0.5943	1.0888	0.1891
Bacteria;Firmicutes;Clostridia;Clostridiales;Ruminococcaceae;Ruminococcus_2;Ruminococcus_bromii_L2-63	68	804	461	193	171	672	645	81	59	99	0.117	1.0146	0.5471	0.2948	0.2318	0.874	0.8305	0.1152	0.093	0.1408
Bacteria;Firmicutes;Clostridia;Clostridiales;Ruminococcaceae;Eubacterium_coprostanoligenes_group;Clostridiales_bacterium_42_27	8	293	357	477	849	20	8	13	9	16	0.0138	0.3697	0.4237	0.7287	1.151	0.026	0.0103	0.0185	0.0142	0.0228
Bacteria;Bacteroidetes;Bacteroidia;Bacteroidales;Bacteroidaceae;Bacteroides;Bacteroides_massiliensis_dnLKV3	35	60	50	108	49	345	220	404	396	116	0.0602	0.0757	0.0593	0.165	0.0664	0.4487	0.2833	0.5744	0.624	0.165
Bacteria;Firmicutes;Clostridia;Clostridiales;Lachnospiraceae;Blautia;Ruminococcus_sp_Marseille-P328	50	114	47	233	226	78	286	122	96	100	0.086	0.1439	0.0558	0.3559	0.3064	0.1015	0.3683	0.1735	0.1513	0.1422
Bacteria;Bacteroidetes;Bacteroidia;Bacteroidales;Bacteroidaceae;Bacteroides;Bacteroides_acidifaciens	121	127	72	11	39	173	219	182	186	80	0.2081	0.1603	0.0854	0.0168	0.0529	0.225	0.282	0.2588	0.2931	0.1138
Bacteria;Proteobacteria;Deltaproteobacteria;Desulfovibrionales;Desulfovibrionaceae;Desulfovibrio;Desulfovibrio_fairfieldensis	69	25	72	15	70	31	3	35	4	373	0.1187	0.0315	0.0854	0.0229	0.0949	0.0403	0.0039	0.0498	0.0063	0.5304
Bacteria;Proteobacteria;Deltaproteobacteria;Desulfovibrionales;Desulfovibrionaceae;Desulfovibrio;Desulfovibrio_piger	9	91	2	206	249	13	13	46	0	8	0.0155	0.1148	0.0024	0.3147	0.3376	0.0169	0.0167	0.0654	0	0.0114
Bacteria;Actinobacteria;Coriobacteriia;Coriobacteriales;Coriobacteriaceae;Collinsella;Collinsella_sp_Marseille-P3740	20	204	119	47	84	10	17	5	10	7	0.0344	0.2574	0.1412	0.0718	0.1139	0.013	0.0219	0.0071	0.0158	0.01
Bacteria;Firmicutes;Clostridia;Clostridiales;Christensenellaceae;Christensenellaceae_R-7_group;bacterium_YE57	91	92	161	60	18	8	7	0	0	32	0.1565	0.1161	0.1911	0.0917	0.0244	0.0104	0.009	0	0	0.0455
Bacteria;Firmicutes;Clostridia;Clostridiales;Lachnospiraceae;Blautia;Lachnospiraceae_bacterium_28-4	0	3	0	2	1	2	0	4	381	2	0	0.0038	0	0.0031	0.0014	0.0026	0	0.0057	0.6003	0.0028
Bacteria;Firmicutes;Clostridia;Clostridiales;Ruminococcaceae;Candidatus_Soleaferrea;Bittarella_massiliensis	36	68	72	22	42	91	38	5	15	12	0.0619	0.0858	0.0854	0.0336	0.0569	0.1184	0.0489	0.0071	0.0236	0.0171
Bacteria;Firmicutes;Clostridia;Clostridiales;Ruminococcaceae;Ruminiclostridium_9;Clostridium_sp_Marseille-P2776	21	7	21	10	6	47	34	51	11	132	0.0361	0.0088	0.0249	0.0153	0.0081	0.0611	0.0438	0.0725	0.0173	0.1877
Bacteria;Bacteroidetes;Bacteroidia;Bacteroidales;Bacteroidaceae;Bacteroides;Bacteroides_sp_Marseille-P2653	18	20	29	9	20	33	80	58	32	31	0.031	0.0252	0.0344	0.0137	0.0271	0.0429	0.103	0.0825	0.0504	0.0441
Bacteria;Bacteroidetes;Bacteroidia;Bacteroidales;Prevotellaceae;Paraprevotella;Paraprevotella_xylaniphila_YIT_11841	5	7	2	26	9	3	130	50	85	3	0.0086	0.0088	0.0024	0.0397	0.0122	0.0039	0.1674	0.0711	0.1339	0.0043
Bacteria;Firmicutes;Clostridia;Clostridiales;Ruminococcaceae;Ruminococcus_1;Ruminococcus_flavefaciens	5	15	32	41	8	126	0	1	2	1	0.0086	0.0189	0.038	0.0626	0.0108	0.1639	0	0.0014	0.0032	0.0014
Bacteria;Firmicutes;Clostridia;Clostridiales;Lachnospiraceae;Blautia;Lachnospiraceae_bacterium_615	4	0	0	1	1	5	44	67	2	29	0.0069	0	0	0.0015	0.0014	0.0065	0.0567	0.0953	0.0032	0.0412
Bacteria;Firmicutes;Bacilli;Bacillales;Staphylococcaceae;Jeotgalicoccus;Jeotgalicoccus_sp_M3T9B12	5	1	4	2	0	7	3	87	23	12	0.0086	0.0013	0.0047	0.0031	0	0.0091	0.0039	0.1237	0.0362	0.0171
Bacteria;Bacteroidetes;Bacteroidia;Bacteroidales;Rikenellaceae;Alistipes;Alistipes_obesi	7	6	3	20	44	16	4	10	10	1	0.012	0.0076	0.0036	0.0306	0.0597	0.0208	0.0052	0.0142	0.0158	0.0014
Bacteria;Firmicutes;Clostridia;Clostridiales;Eubacteriaceae;Anaerofustis;Anaerofustis_stercorihominis_DSM_17244	0	0	4	3	1	35	63	10	6	6	0	0	0.0047	0.0046	0.0014	0.0455	0.0811	0.0142	0.0095	0.0085
Archaea;Euryarchaeota;Methanobacteria;Methanobacteriales;Methanobacteriaceae;Methanosphaera;Methanosphaera_cuniculi	6	59	17	3	44	0	0	0	0	0	0.0103	0.0745	0.0202	0.0046	0.0597	0	0	0	0	0
Bacteria;Actinobacteria;Actinobacteria;Corynebacteriales;Corynebacteriaceae;Corynebacterium_1;Corynebacterium_glutamicum	11	9	12	4	2	16	1	42	10	8	0.0189	0.0114	0.0142	0.0061	0.0027	0.0208	0.0013	0.0597	0.0158	0.0114
Bacteria;Firmicutes;Negativicutes;Selenomonadales;Veillonellaceae;Megamonas;Megamonas_funiformis_YIT_11815	1	19	0	10	5	8	57	5	0	3	0.0017	0.024	0	0.0153	0.0068	0.0104	0.0734	0.0071	0	0.0043
Bacteria;Bacteroidetes;Bacteroidia;Bacteroidales;Bacteroidaceae;Bacteroides;Bacteroides_caccae	4	34	2	6	28	1	0	8	6	0	0.0069	0.0429	0.0024	0.0092	0.038	0.0013	0	0.0114	0.0095	0
Bacteria;Bacteroidetes;Bacteroidia;Bacteroidales;Rikenellaceae;Alistipes;Faecalibacterium_prausnitzii	17	6	0	16	8	13	1	1	0	14	0.0292	0.0076	0	0.0244	0.0108	0.0169	0.0013	0.0014	0	0.0199
Bacteria;Actinobacteria;Coriobacteriia;Coriobacteriales;Coriobacteriaceae;Collinsella;Collinsella_intestinalis_DSM_13280	4	35	0	8	8	0	3	7	9	1	0.0069	0.0442	0	0.0122	0.0108	0	0.0039	0.01	0.0142	0.0014
Bacteria;Firmicutes;Clostridia;Clostridiales;Ruminococcaceae;Ruminiclostridium_5;Ruminiclostridium_sp_KB18	5	0	4	4	2	14	4	19	2	14	0.0086	0	0.0047	0.0061	0.0027	0.0182	0.0052	0.027	0.0032	0.0199
Bacteria;Actinobacteria;Actinobacteria;Corynebacteriales;Corynebacteriaceae;Corynebacterium_1;Corynebacterium_urealyticum	0	0	0	0	0	1	0	47	8	0	0	0	0	0	0	0.0013	0	0.0668	0.0126	0
Bacteria;Bacteroidetes;Bacteroidia;Bacteroidales;Bacteroidaceae;Bacteroides;Bacteroides_sp_Marseille-P3132	1	0	0	0	1	0	1	25	13	5	0.0017	0	0	0	0.0014	0	0.0013	0.0355	0.0205	0.0071
Bacteria;Firmicutes;Erysipelotrichia;Erysipelotrichales;Erysipelotrichaceae;Holdemania;Holdemania_filiformis	0	0	3	0	8	15	5	8	5	1	0	0	0.0036	0	0.0108	0.0195	0.0064	0.0114	0.0079	0.0014
Bacteria;Bacteroidetes;Bacteroidia;Bacteroidales;Rikenellaceae;Alistipes;Alistipes_indistinctus_YIT_12060	5	4	0	1	0	6	4	15	2	5	0.0086	0.005	0	0.0015	0	0.0078	0.0052	0.0213	0.0032	0.0071
Bacteria;Firmicutes;Clostridia;Clostridiales;Ruminococcaceae;Candidatus_Soleaferrea;Candidatus_Soleaferrea_massiliensis	0	3	3	0	30	0	0	3	1	4	0	0.0038	0.0036	0	0.0407	0	0	0.0043	0.0016	0.0057
Bacteria;Proteobacteria;Gammaproteobacteria;Enterobacteriales;Enterobacteriaceae;Proteus;Proteus_vulgaris	2	1	0	1	2	0	0	21	9	1	0.0034	0.0013	0	0.0015	0.0027	0	0	0.0299	0.0142	0.0014
Bacteria;Firmicutes;Erysipelotrichia;Erysipelotrichales;Erysipelotrichaceae;Turicibacter;Turicibacter_sp_LA61	1	7	12	1	0	3	5	3	1	5	0.0017	0.0088	0.0142	0.0015	0	0.0039	0.0064	0.0043	0.0016	0.0071
Bacteria;Firmicutes;Clostridia;Clostridiales;Ruminococcaceae;Phocea;Phocea_massiliensis	6	0	0	2	1	8	6	4	5	0	0.0103	0	0	0.0031	0.0014	0.0104	0.0077	0.0057	0.0079	0
Bacteria;Bacteroidetes;Bacteroidia;Bacteroidales;Tannerellaceae;Parabacteroides;Parabacteroides_merdae	2	0	4	5	2	1	4	4	10	0	0.0034	0	0.0047	0.0076	0.0027	0.0013	0.0052	0.0057	0.0158	0
Bacteria;Bacteroidetes;Bacteroidia;Bacteroidales;Bacteroidaceae;Bacteroides;Bacteroides_uniformis	0	0	1	3	0	2	9	7	6	4	0	0	0.0012	0.0046	0	0.0026	0.0116	0.01	0.0095	0.0057
Bacteria;Firmicutes;Bacilli;Lactobacillales;Enterococcaceae;Enterococcus;Enterococcus_faecalis	3	3	3	3	5	2	1	3	6	2	0.0052	0.0038	0.0036	0.0046	0.0068	0.0026	0.0013	0.0043	0.0095	0.0028
Bacteria;Firmicutes;Clostridia;Clostridiales;Ruminococcaceae;Ruminiclostridium_9;Ruminococcaceae_bacterium_D16	0	0	0	0	0	0	27	1	5	0	0	0	0	0	0	0	0.0348	0.0014	0.0079	0
Bacteria;Proteobacteria;Gammaproteobacteria;Aeromonadales;Aeromonadaceae;Aeromonas;Aeromonas_veronii	0	9	0	0	21	1	0	0	0	0	0	0.0114	0	0	0.0285	0.0013	0	0	0	0
Bacteria;Bacteroidetes;Bacteroidia;Bacteroidales;Bacteroidaceae;Bacteroides;Bacteroides_thetaiotaomicron	0	1	9	10	0	7	0	0	1	0	0	0.0013	0.0107	0.0153	0	0.0091	0	0	0.0016	0
Bacteria;Bacteroidetes;Bacteroidia;Bacteroidales;Bacteroidaceae;Bacteroides;Bacteroides_eggerthii	0	1	1	1	1	5	3	4	6	3	0	0.0013	0.0012	0.0015	0.0014	0.0065	0.0039	0.0057	0.0095	0.0043
Bacteria;Bacteroidetes;Bacteroidia;Bacteroidales;Tannerellaceae;Parabacteroides;Parabacteroides_goldsteinii	0	0	0	1	1	0	0	9	10	2	0	0	0	0.0015	0.0014	0	0	0.0128	0.0158	0.0028
Bacteria;Bacteroidetes;Bacteroidia;Bacteroidales;Prevotellaceae;Alloprevotella;Prevotellamassilia_timonensis	3	1	5	2	0	2	3	5	1	2	0.0052	0.0013	0.0059	0.0031	0	0.0026	0.0039	0.0071	0.0016	0.0028
Bacteria;Firmicutes;Bacilli;Bacillales;Planococcaceae;Sporosarcina;Sporosarcina_pasteurii	0	0	0	0	0	0	0	10	9	2	0	0	0	0	0	0	0	0.0142	0.0142	0.0028
Bacteria;Firmicutes;Clostridia;Clostridiales;Ruminococcaceae;Ruminococcus_1;Ruminococcus_sp_Zagget7	0	0	0	0	0	2	11	0	6	0	0	0	0	0	0	0.0026	0.0142	0	0.0095	0
Bacteria;Firmicutes;Erysipelotrichia;Erysipelotrichales;Erysipelotrichaceae;Holdemania;Holdemania_massiliensis_AP2	0	0	0	0	0	4	0	1	11	0	0	0	0	0	0	0.0052	0	0.0014	0.0173	0
Bacteria;Proteobacteria;Gammaproteobacteria;Pasteurellales;Pasteurellaceae;Rodentibacter;Rodentibacter_ratti	4	0	2	0	1	3	0	0	4	2	0.0069	0	0.0024	0	0.0014	0.0039	0	0	0.0063	0.0028
Bacteria;Actinobacteria;Coriobacteriia;Coriobacteriales;Coriobacteriaceae;Collinsella;Collinsella_tanakaei_YIT_12063	0	3	2	0	2	2	6	2	1	0	0	0.0038	0.0024	0	0.0027	0.0026	0.0077	0.0028	0.0016	0
Bacteria;Firmicutes;Clostridia;Clostridiales;Ruminococcaceae;Oscillibacter;Oscillibacter_sp_1-3	10	0	0	2	0	0	0	0	0	2	0.0172	0	0	0.0031	0	0	0	0	0	0.0028
Bacteria;Bacteroidetes;Bacteroidia;Bacteroidales;Tannerellaceae;Parabacteroides;bacterium_NLAE-zl-P241	0	0	0	1	0	6	2	1	4	0	0	0	0	0.0015	0	0.0078	0.0026	0.0014	0.0063	0
Bacteria;Firmicutes;Clostridia;Clostridiales;Lachnospiraceae;Marvinbryantia;Clostridiales_bacterium_CIEAF_012	3	1	3	1	3	0	0	0	1	0	0.0052	0.0013	0.0036	0.0015	0.0041	0	0	0	0.0016	0
Bacteria;Firmicutes;Clostridia;Clostridiales;Lachnospiraceae;Lachnoclostridium;Lachnoclostridium_sp_YL32	3	0	3	0	0	0	6	0	0	0	0.0052	0	0.0036	0	0	0	0.0077	0	0	0
Bacteria;Firmicutes;Clostridia;Clostridiales;Christensenellaceae;Christensenellaceae_R-7_group;Clostridiales_bacterium_Marseille-P2846	0	1	5	1	4	0	0	0	0	0	0	0.0013	0.0059	0.0015	0.0054	0	0	0	0	0
Bacteria;Firmicutes;Clostridia;Clostridiales;Ruminococcaceae;Ruminiclostridium_5;Neglecta_timonensis	0	2	1	2	3	0	0	0	0	2	0	0.0025	0.0012	0.0031	0.0041	0	0	0	0	0.0028
Bacteria;Actinobacteria;Coriobacteriia;Coriobacteriales;Coriobacteriaceae;Collinsella;Collinsella_phocaeensis	1	0	0	0	0	1	3	3	0	0	0.0017	0	0	0	0	0.0013	0.0039	0.0043	0	0
Bacteria;Firmicutes;Clostridia;Clostridiales;Ruminococcaceae;UBA1819;Ruthenibacterium_lactatiformans	0	0	0	0	1	0	4	1	1	0	0	0	0	0	0.0014	0	0.0052	0.0014	0.0016	0
Bacteria;Firmicutes;Clostridia;Clostridiales;Lachnospiraceae;Lachnospiraceae_NK4A136_group;Blautia_coccoides	2	0	0	0	0	2	1	0	1	0	0.0034	0	0	0	0	0.0026	0.0013	0	0.0016	0
Bacteria;Firmicutes;Clostridia;Clostridiales;Lachnospiraceae;Lachnospiraceae_NK4A136_group;Lachnospiraceae_bacterium_COE1	0	0	0	0	0	0	2	0	0	4	0	0	0	0	0	0	0.0026	0	0	0.0057
Bacteria;Bacteroidetes;Bacteroidia;Bacteroidales;Muribaculaceae;Muribaculum;Parabacteroides_sp_YL27	0	0	0	2	0	1	0	0	1	1	0	0	0	0.0031	0	0.0013	0	0	0.0016	0.0014
Bacteria;Firmicutes;Bacilli;Lactobacillales;Lactobacillaceae;Lactobacillus;Lactobacillus_johnsonii_FI9785	0	0	1	2	0	0	0	0	1	1	0	0	0.0012	0.0031	0	0	0	0	0.0016	0.0014
Bacteria;Firmicutes;Clostridia;Clostridiales;Ruminococcaceae;Fournierella;Fournierella_massiliensis	1	0	0	0	0	1	0	1	0	2	0.0017	0	0	0	0	0.0013	0	0.0014	0	0.0028
Bacteria;Firmicutes;Bacilli;Lactobacillales;Aerococcaceae;Globicatella;Globicatella_sp_canine_oral_taxon_218	0	0	0	0	0	3	0	0	2	0	0	0	0	0	0	0.0039	0	0	0.0032	0
Bacteria;Firmicutes;Clostridia;Clostridiales;Ruminococcaceae;Candidatus_Soleaferrea;Ruminococcaceae_bacterium_Marseille-P2935	1	0	0	0	0	0	2	0	0	2	0.0017	0	0	0	0	0	0.0026	0	0	0.0028
Bacteria;Proteobacteria;Gammaproteobacteria;Xanthomonadales;Xanthomonadaceae;Stenotrophomonas;Stenotrophomonas_maltophilia	0	0	0	1	4	0	0	0	0	0	0	0	0	0.0015	0.0054	0	0	0	0	0
Bacteria;Firmicutes;Bacilli;Bacillales;Staphylococcaceae;Staphylococcus;Staphylococcus_sciuri	0	0	0	2	1	0	0	0	1	0	0	0	0	0.0031	0.0014	0	0	0	0.0016	0
Bacteria;Firmicutes;Bacilli;Bacillales;Planococcaceae;Savagea;Savagea_faecisuis	0	1	0	0	0	0	0	3	0	0	0	0.0013	0	0	0	0	0	0.0043	0	0
Bacteria;Actinobacteria;Coriobacteriia;Coriobacteriales;Coriobacteriaceae;Collinsella;Collinsella_aerofaciens	0	1	0	1	1	0	1	0	0	0	0	0.0013	0	0.0015	0.0014	0	0.0013	0	0	0
Bacteria;Firmicutes;Clostridia;Clostridiales;Christensenellaceae;Christensenella;Christensenella_minuta	1	0	0	0	1	1	0	0	0	0	0.0017	0	0	0	0.0014	0.0013	0	0	0	0
Bacteria;Firmicutes;Clostridia;Clostridiales;Ruminococcaceae;Butyricicoccus;Clostridiales_bacterium_DJF_B152	0	0	0	0	0	0	1	1	1	0	0	0	0	0	0	0	0.0013	0.0014	0.0016	0
Bacteria;Firmicutes;Clostridia;Clostridiales;Lachnospiraceae;Lachnospiraceae_NK4A136_group;Lachnospiraceae_bacterium_DW17	0	0	0	0	0	1	0	0	0	2	0	0	0	0	0	0.0013	0	0	0	0.0028
Bacteria;Firmicutes;Bacilli;Lactobacillales;Lactobacillaceae;Lactobacillus;Lactobacillus_faecis	0	0	0	0	0	0	0	0	2	0	0	0	0	0	0	0	0	0	0.0032	0
Bacteria;Firmicutes;Bacilli;Lactobacillales;Lactobacillaceae;Lactobacillus;Lactobacillus_jensenii	0	0	0	0	0	0	0	0	2	0	0	0	0	0	0	0	0	0	0.0032	0
Bacteria;Bacteroidetes;Bacteroidia;Bacteroidales;Rikenellaceae;Alistipes;Alistipes_sp_Marseille-P2431	1	0	0	1	0	0	0	0	0	0	0.0017	0	0	0.0015	0	0	0	0	0	0
Bacteria;Firmicutes;Bacilli;Lactobacillales;Lactobacillaceae;Lactobacillus;bacterium_ii1270	0	0	0	0	0	0	0	2	0	0	0	0	0	0	0	0	0	0.0028	0	0
Bacteria;Firmicutes;Clostridia;Clostridiales;Lachnospiraceae;Blautia;Blautia_glucerasea	0	1	1	0	0	0	0	0	0	0	0	0.0013	0.0012	0	0	0	0	0	0	0
Bacteria;Proteobacteria;Gammaproteobacteria;Betaproteobacteriales;Burkholderiaceae;Comamonas;Comamonas_aquatica	0	0	0	0	0	0	0	0	1	0	0	0	0	0	0	0	0	0	0.0016	0
Bacteria;Firmicutes;Bacilli;Lactobacillales;Lactobacillaceae;Lactobacillus;Lactobacillus_casei	0	0	0	0	0	0	0	0	1	0	0	0	0	0	0	0	0	0	0.0016	0
Bacteria;Bacteroidetes;Bacteroidia;Bacteroidales;Rikenellaceae;Alistipes;Alistipes_shahii_WAL_8301	0	0	0	1	0	0	0	0	0	0	0	0	0	0.0015	0	0	0	0	0	0
Bacteria;Actinobacteria;Coriobacteriia;Coriobacteriales;Atopobiaceae;Olsenella;Olsenella_sp_Marseille-P2300	0	0	0	1	0	0	0	0	0	0	0	0	0	0.0015	0	0	0	0	0	0
Bacteria;Actinobacteria;Actinobacteria;Bifidobacteriales;Bifidobacteriaceae;Bifidobacterium;Bifidobacterium_animalis	0	0	0	0	0	0	0	1	0	0	0	0	0	0	0	0	0	0.0014	0	0
Bacteria;Firmicutes;Clostridia;Clostridiales;Ruminococcaceae;Butyricicoccus;Butyricicoccus_pullicaecorum_12	0	0	0	0	0	0	0	0	0	1	0	0	0	0	0	0	0	0	0	0.0014
Bacteria;Firmicutes;Bacilli;Lactobacillales;Enterococcaceae;Enterococcus;Enterococcus_casseliflavus	0	0	0	0	0	0	0	1	0	0	0	0	0	0	0	0	0	0.0014	0	0
Bacteria;Firmicutes;Clostridia;Clostridiales;Ruminococcaceae;Intestinimonas;Intestinimonas_butyriciproducens	0	0	0	0	1	0	0	0	0	0	0	0	0	0	0.0014	0	0	0	0	0
Bacteria;Firmicutes;Bacilli;Lactobacillales;Streptococcaceae;Streptococcus;Streptococcus_merionis_DSM_19192	0	0	0	0	0	0	0	1	0	0	0	0	0	0	0	0	0	0.0014	0	0
Bacteria;Firmicutes;Clostridia;Clostridiales;Lachnospiraceae;Lachnoclostridium;butyrate-producing_bacterium_SM4/1	0	0	0	0	0	0	0	0	0	1	0	0	0	0	0	0	0	0	0	0.0014
Bacteria;Firmicutes;Clostridia;Clostridiales;Ruminococcaceae;Ruminococcus_1;Bacteroidetes_bacterium_ADurbBinA104	0	0	0	0	0	1	0	0	0	0	0	0	0	0	0	0.0013	0	0	0	0
Bacteria;Actinobacteria;Actinobacteria;Corynebacteriales;Corynebacteriaceae;Corynebacterium_1;Corynebacterium_stationis	0	0	0	0	0	0	1	0	0	0	0	0	0	0	0	0	0.0013	0	0	0
Bacteria;Firmicutes;Clostridia;Clostridiales;Ruminococcaceae;Ruminiclostridium_6;Eubacterium_siraeum_DSM_15702	0	0	1	0	0	0	0	0	0	0	0	0	0.0012	0	0	0	0	0	0	0
Unclassified	53488	63209	73462	58445	65165	67301	66119	59211	47065	54178	92.008	79.7661	87.1807	89.2823	88.3438	87.5359	85.1392	84.1903	74.1579	77.047
